1 **Linkage disequilibrium and population structure in a core collection of *Brassica napus* (L.)**

2

3

4 Mukhlesur Rahman<sup>1¶\*</sup>, Ahasanul Hoque<sup>1,2¶</sup>, Jayanta Roy<sup>1</sup>

5

6 <sup>1</sup>Department of Pant Sciences, North Dakota State University, Fargo, North Dakota, USA

7

8 <sup>2</sup>Department of Genetics and Plant Breeding, Bangladesh Agricultural University, Mymensingh,

9 Bangladesh

10

11 \*Corresponding author: [md.m.rahman@ndsu.edu](mailto:md.m.rahman@ndsu.edu); phone: (701) 231-5768; fax: 701-231-8474

12 ¶These authors have contributed equally to this work and share first authorship

13

14

15

16

17

18

19

20

21

22

23

24

## 25 **Abstract**

26 Estimation of genetic diversity in rapeseed/canola is important for sustainable breeding program  
27 to provide an option for the development of new breeding lines. The objective of this study was  
28 to elucidate the patterns of genetic diversity within and among different structural groups, and  
29 measure the extent of linkage disequilibrium (LD) of 383 globally distributed rapeseed/canola  
30 germplasm using 8,502 single nucleotide polymorphism (SNP) markers. The germplasm  
31 accessions were divided into five subpopulations (P1 to P5) with obvious geographic and growth  
32 habit-related patterns. All subpopulations showed moderate genetic diversity (average  $H = 0.22$   
33 and  $I = 0.34$ ). The pairwise  $F_{st}$  comparison revealed a great degree of divergence ( $F_{st} > 0.24$ )  
34 between most of the combinations. The rutabaga type showed highest divergence with spring and  
35 winter types. Higher divergence was also found between winter and spring types. Overall, mean  
36 linkage disequilibrium was 0.03 and it decayed to its half maximum within  $< 45$  kb distance for  
37 whole genome. The LD decay was slower in C genome ( $< 93$  kb), relative to the A genome ( $< 21$   
38 kb) which was confirmed by availability of larger haplotype blocks in C genome than A genome.  
39 To maximize genetic gain, hybridization between rutabaga and other types are potentially the  
40 best option. Hybridization between spring and winter, semi-winter type is also helpful to  
41 maximize the diversity in subsequent populations. Low genetic differentiation between both  
42 spring type subpopulations (P4 and P3) will accelerate favorable allele accumulation for specific  
43 traits in elite lines. The Neighbor-Joining tree and kinship matrix will assist to identify distantly  
44 related genotypes from subpopulations to utilize in hybridization. The low levels of LD and  
45 population structure make the core collection an important resource for association mapping  
46 efforts to identify genes useful in crop improvement as well as for selection of parents for hybrid  
47 breeding.

## 48 Introduction

49 Rapeseed/canola (*Brassica napus* L., AACC,  $2n = 4x = 38$ ), is a recent allopolyploid of  
50 polyphyletic origin that evolved from hybridization events between two parental ancestors of *B.*  
51 *oleracea* (Mediterranean cabbage, CC,  $2n = 2x = 18$ ) and *B. rapa* (Asian cabbage or rapeseed,  
52 AA,  $2n = 2x = 20$ ) (1). Rapeseed/canola is the second largest oilseed crops produced in the world  
53 after soybean (2). Canola oil is mostly used in frying and baking, margarine, salad dressings, and  
54 many other products. Because of its fatty acid profile and the lowest amount of saturated fat  
55 among all other oils, it is commonly consumed all over the world and is considered a very  
56 healthy oil (3). Canola oil is also rich with alpha-linolenic acid (ALA), which is associated to a  
57 lower risk of cardiovascular disease (3). Additionally, canola is utilized as a livestock meal and  
58 is the second largest protein meal in the world after soybean (4). In the United States of America,  
59 the canola production increased 13.5 folds from five years average of 1991-1995 (0.11 m tons) to  
60 five years average of 2015-2019 (1.49 m tons) (5). Due to the growing importance of canola  
61 there is a constant need to improve its yield which can be negatively affected by biotic and  
62 abiotic stresses. Canola expresses three growth habits, winter, spring and semi-winter. The spring  
63 canola is planted in the early spring and harvested in the late spring of the same growing season  
64 (6). The winter type canola is seeded in the fall, vernalized over the winter to induce flower and  
65 harvested in the summer (6). The semi-winter type is needed for a shorter period of vernalization  
66 to induce flower (7). In order to adapt to different growing regions, plants developed systems  
67 that sense temperature, light quality, day length, as well as stress signals (8–11). Plants from  
68 colder zones require vernalization to flowering (12). Also day length and light quality affect the  
69 ability to flower after winter (13). The transition from the vegetative to flowering stage is also  
70 controlled by plant hormones and the circadian clock (14, 15). Multiple studies suggest the

71 Arabidopsis flowering-time gene network might be similar to the one in Brassica (16, 17).  
72 Detailed understanding of the nature of genes involved in the growth habits of canola will  
73 facilitate development of cultivars adapted to different latitudes (18).

74 Due to limited use of diversified germplasm in breeding program, development of  
75 superior cultivars through traditional breeding might become unsuccessful and lead to stagnation  
76 in plant improvement (19). The recent origin of *B. napus* as a species and its very recent  
77 domestication (400 years ago), as well as selection on few phenotypes (e.g. low erucic and  
78 glucosinolate acids, seed yield) contributed to the low diversity which threatens sustainable  
79 production of the crop (20). The narrow genetic diversity might also limit the prospects for  
80 hybrid breeding where complementing gene pools are needed for the optimal exploitation of  
81 heterosis (21). Therefore, it is crucial to study, preserve, and even introduce genetic diversity into  
82 rapeseed since the diversity is the best source of biotic and abiotic stress resistance, and various  
83 agronomical and morphological traits. Canola improvement can benefit from the availability and  
84 detailed characterization of genetically diverse germplasm. The knowledge of population  
85 structure, genetic relatedness, and patterns of linkage disequilibrium (LD) are also prime  
86 requirements for genome-wide association study (GWAS) and genome selection directed  
87 breeding strategies (22, 23).

88 Multiple genetic diversity and population structure studies, based on LD, have already  
89 provided information in regards to genetic diversity in various *B. napus* collections around the  
90 world (24–27). Unfortunately, there is a limited number of studies investigating the genetic  
91 variation of canola germplasms in the U.S. core collection justifying a great need for such a  
92 research focus. The LD analysis provides an important insight into the history of the species. It  
93 also provides valuable direction to breeders in need to diversify their crop gene pools (28). Here

94 we report a study revealing population structure and LD pattern of the U.S. core collection with  
95 good representation of the genetic diversity present in global rapeseed/canola germplasm  
96 accessions.

## 97 **Materials and methods**

### 98 **Plant samples and phenotyping**

99 A collection of 383 canola germplasm accessions originated in 24 countries comprising  
100 spring, winter, semi-winter, and rutabaga types, were collected from North Central Regional  
101 Plant Introduction Station (NCRPIS), Ames, Iowa, USA and North Dakota State University  
102 (NDSU) (S1 Table). The collection consists of 156 spring, 152 winter, 58 semi-winter, and 17  
103 rutabaga types. Growth habit was determined by growing the accessions in a greenhouse for at  
104 least two seasons and in a field for two years at two locations. Field flowering time was recorded  
105 as number of days from seeding date to flowering date where first flowers opened on half of the  
106 plants belonging to a single accession. Spring type accessions flowered within 40-60 days after  
107 planting, the semi-winter types flowered from 70 to 110 days. On the other hand, winter types  
108 did not flower under field conditions. Vernalization treatment was conducted on greenhouse  
109 grown winter type accessions to induce flowering and also to confirm the winter habit type  
110 according to Rahman and McClean (2013) (6).

### 111 **Genotyping and sequencing**

112 Young leaves were collected from 30 days old plants and flash-frozen in liquid nitrogen.  
113 Tubes were stored at -80°C until lyophilized. The lyophilized leaf tissue was ground in tubes

114 with stainless beads using a plate shaker. DNA was extracted using Qiagen DNeasy Kit (Qiagen,  
115 CA, USA) from lyophilized tissue following the manufacturer's protocol. DNA concentration  
116 was measured using a NanoDrop 2000/2000c Spectrophotometer (ThermoFisher Scientific). The  
117 ApeKI enzyme was used for GBS library preparation (29). Sequencing of the library was done at  
118 the University of Texas Southwestern Medical Center, Dallas, Texas, USA using Illumina HiSeq  
119 2500 sequencer.

120

## 121 **SNP calling**

122 TASSEL 5 GBSv2 pipeline (30) was used for SNP calling using a 120-base kmer length  
123 and minimum kmer count of ten. The reads were aligned to the canola reference genome (31)  
124 (available at:  
125 [ftp.ncbi.nlm.nih.gov/genomes/all/GCF/000/686/985/GCF\\_000686985.2\\_Bra\\_napus\\_v2.0/](ftp.ncbi.nlm.nih.gov/genomes/all/GCF/000/686/985/GCF_000686985.2_Bra_napus_v2.0/)) using  
126 Bowtie 2 (version 2.3.0) alignment tool (32). After passing all the required steps of TASSEL 5  
127 GBSv2 pipeline, 497336 unfiltered SNPs were identified. Then VCFtools (33) was used to select  
128 bi-allelic SNPs considering the criteria: minor allele frequency (MAF)  $\geq 0.05$ , missing values  
129 (max-missing)  $\leq 50\%$ , depth (minDP)  $\geq 5$  and physical distance (thin)  $\leq 1000$  bp. The SNPs that  
130 were located outside chromosomes (i.e. position unknown), were removed. As canola is a self-  
131 pollinating crop, the SNPs that were heterozygous in more than 25% of total genotypes, were  
132 also removed using TASSEL (34). All these filtering steps resulted in a total of 8,502 SNP  
133 markers.

134

## 135 **Data analysis**

136           The core collection was divided into genetic groups using STRUCTURE v2.3.4 (35)  
137 software. The admixture model, a burnin period of 10000 and 50000 Monte Carlo Markov Chain  
138 (MCMC) iterations with 10 replications per K (K1-K10), were used as parameters for structure  
139 analysis. The optimal number of groups was determined based on DeltaK approach (36) which  
140 was performed by Structure Harvester (37). The individual Q matrix for the optimal K value was  
141 generated utilizing membership coefficient matrices of ten replicates from STRUCTURE  
142 analysis using CLUMPP (38). The results of structure analysis was visualized using the Structure  
143 Plot v2 software (39). Principal component analysis (PCA) was conducted by covariance  
144 standardized approach in TASSEL (34). An unrooted neighbor-joining (NJ) phylogenetic tree  
145 was constructed using MEGAX program with 1000 bootstraps (40). Resulting tree was displayed  
146 using FigTree V1.4.4 (41).

147           Analysis of molecular variance (AMOVA) was done to partition the genetic variance  
148 among the groups identified by STRUCTURE in Arlequin3.5. The average pairwise between-  
149 population  $F_{st}$  values were also calculated using Arlequin3.5 (42). GenAlex v6.5 (43) was used  
150 to estimate percentage of polymorphic loci, number of effective alleles, Shannon's information  
151 index, expected heterozygosity and unbiased expected heterozygosity of each marker and  
152 subpopulation. The SNP distribution plot was developed using R package CMplot (available at:  
153 <https://github.com/YinLiLin/R-CMplot>). The polymorphism information content (PIC) of  
154 markers was calculated using software Cervus (44). Tajima's D value of each group was  
155 calculated using MEGAX software (40). The kinship (IBS) matrix was calculated using software  
156 Numericware i (45), kinship heatmap and histogram were developed using R package

157 ComplexHeatmap (46). The level of relatedness (IBS coefficients) was correlated with  
158 Shannon's information index (I) and diversity (H) in R v3.5.2 (47). Linkage disequilibrium (LD)  
159 pattern of whole collection and different subpopulations were analyzed using PopLDdecay (48).  
160 The mean linked LD was calculated by dividing total  $r^2$  value with total number of  
161 corresponding loci pair. In this case,  $r^2 < 0.2$  was considered only. Same procedure was followed  
162 to calculate mean unlinked LD where  $r^2 \geq 0.2$  was considered. Haplotype block analysis was  
163 done using PLINK (49) with a window size of 5 Mb. Confidence interval (CI) method (50) was  
164 used to identify haplotype blocks with high LD. Haplotype blocks (>19 Kb), observed in one  
165 subpopulation but not in the other, were considered to be subpopulation-specific block.  
166 Haplotype blocks (>19 Kb) shared by more than one subpopulation, were considered to be  
167 common to corresponding subpopulations.

## 168 **Results**

### 169 **SNP profile**

170 The selected 8,502 SNPs were distributed across 19 chromosomes with an average  
171 marker density of 1 per 99.5 kb. Chromosome A3 and A4 contained highest (685 SNPs, 8.06%)  
172 and lowest (236 SNPs, 2.78%) number of SNPs, respectively. The SNP density was highest on  
173 chromosome A7 (71.1 kb) and was lowest on chromosome C9 (134.5 kb) (Table 1, Fig 1). The  
174 occurrence of transition SNPs (4,956 SNPs) was more than that of transversions (3,546 SNPs)  
175 with a ratio of 1.40. The ratio of transitions to transversions SNPs was higher in A genome (1.41)  
176 than that of in C genome (1.38). In both genome, G/C transversions were lowest (4.33% and  
177 4.29%), but A/G and C/T transitions occurred in almost similar frequencies (Table 2). The  
178 inbreeding coefficient within individuals ( $F_{st}$ ), inbreeding coefficient within subpopulations ( $F_{st}$ ),



179 observed heterozygosity ( $H_o$ ) and fixation index ( $F$ ) of all the markers ranged from -0.45 to 1.00,  
 180 0 to 0.73, 0 to 0.57 and 0.40 to 1.00, respectively. The Shannon's information index ( $I$ ) of all  
 181 markers ranged from 0.10 to 0.69 with a mean value of 0.37. The expected heterozygosity ( $H_e$ )  
 182 ranged from 0.05 to 0.50 with a mean value of 0.27. The polymorphic information content ( $PIC$ )  
 183 ranged from 0.05 to 0.37 with a mean value of 0.22 (S2 Table). Subpopulation-wise marker  
 184 diversity parameters are presented in supplementary S3 Table.

185 **Table 1. Chromosomewise distribution of SNP markers.**

186

| Chromosome | No. of SNPs | % SNPs | Start position | End position | Length (Mb) | Density (Kb) |
|------------|-------------|--------|----------------|--------------|-------------|--------------|
| A1         | 440         | 5.18   | 149163         | 35806075     | 35.7        | 81.0         |
| A2         | 392         | 4.61   | 13430          | 34692905     | 34.7        | 88.5         |
| A3         | 685         | 8.06   | 2769           | 49103583     | 49.1        | 71.7         |
| A4         | 236         | 2.78   | 32805          | 23517671     | 23.5        | 99.5         |
| A5         | 413         | 4.86   | 18668          | 31435105     | 31.4        | 76.1         |
| A6         | 448         | 5.27   | 120409         | 36005103     | 35.9        | 80.1         |
| A7         | 384         | 4.52   | 85869          | 27388322     | 27.3        | 71.1         |
| A8         | 281         | 3.31   | 231427         | 27734410     | 27.5        | 97.9         |
| A9         | 541         | 6.36   | 81404          | 45841268     | 45.8        | 84.6         |
| A10        | 305         | 3.59   | 133853         | 22085737     | 22.0        | 72.0         |
| C1         | 445         | 5.23   | 86671          | 50660872     | 50.6        | 113.7        |
| C2         | 589         | 6.93   | 92431          | 68260222     | 68.2        | 115.7        |
| C3         | 651         | 7.66   | 3839           | 80365889     | 80.36       | 123.4        |
| C4         | 634         | 7.46   | 138930         | 70507417     | 70.4        | 111.0        |
| C5         | 366         | 4.30   | 26760          | 44124497     | 44.1        | 120.5        |
| C6         | 414         | 4.87   | 275190         | 45479327     | 45.2        | 109.2        |
| C7         | 518         | 6.09   | 271113         | 62304827     | 62.0        | 119.8        |
| C8         | 383         | 4.50   | 57934          | 46317429     | 46.3        | 120.8        |
| C9         | 377         | 4.43   | 920885         | 51627086     | 50.7        | 134.5        |
| Mean       | 447.47      |        |                |              |             | 99.5         |

187

188 **Fig 1. Chromosome-wise SNP density map.** Frequency of SNPs varies according to color  
 189 gradient.

190

191 **Table 2. Transition and transversion SNPs across the genome.**

192

| Genome | SNP type      | Model | No. of sites | Frequencies (%) | Total (percentage) |
|--------|---------------|-------|--------------|-----------------|--------------------|
| A      | Transitions   | A/G   | 1195         | 14.06           | 2416 (28.3%)       |
|        |               | C/T   | 1221         | 14.36           |                    |
|        | Transversions | A/T   | 457          | 5.38            | 1709 (20.1%)       |
|        |               | A/C   | 424          | 4.99            |                    |
|        |               | G/T   | 460          | 5.41            |                    |
|        |               | G/C   | 368          | 4.33            |                    |
| C      | Transitions   | A/G   | 1273         | 14.97           | 2540 (29.9%)       |
|        |               | C/T   | 1267         | 14.90           |                    |
|        | Transversions | A/T   | 496          | 5.83            | 1837(21.6%)        |
|        |               | A/C   | 482          | 5.67            |                    |
|        |               | G/T   | 494          | 5.81            |                    |
|        |               | G/C   | 365          | 4.29            |                    |

193

## 194 **Population structure**

195       The whole collection was divided into six subpopulations based on structure analysis  
196 using the Delta K approach (Fig 2A). Genotypes of different types and origins were well  
197 clustered. The winter, semi-winter, rutabaga type genotypes were grouped under subpopulation-1  
198 (P1), subpopulation-2 (P2), and subpopulation-5 (P5), respectively. The spring type genotypes  
199 were grouped under two subpopulations: subpopulation-3 (P3) and subppulation-4 (P4) whereas  
200 subpopulation-6 (P6) composed of only nine genotypes of different types (Fig 2B). Though each  
201 subpopulation consisted of genotypes of different origin, P1, P2 and P4 were dominated by  
202 European, Asian and American (NDSU breeding lines) genotypes, respectively, whereas P3, P5  
203 and P6 were composed of genotypes of mixed origin. We performed principal component  
204 analysis (PCA) to show the genetic similarity among subpopulations and genotypes. The first  
205 two axes explained 21% of the total observed variation (S4 Table). The PCA revealed that  
206 subpopulation P1, P2, P3, P4 and P5 were well clustered and separated from each other, but  
207 genotypes of P6 were scattered within other subpopulations (Fig 3). In addition to that, we also

208 constructed phylogenetic tree based on neighbor joining (NJ) criteria (Fig 4). The output of  
209 neighbor-joining (NJ) tree analysis was in line with that of PCA. Based on the PCA and NJ  
210 output, we merged the P6 genotypes into P1, P2, P3 and P4 and considered five subpopulations  
211 for further analysis and discussions. Based on individual Q matrix, the proportion of pure (non-  
212 hybrid) and admixed (containing markers assigned to more than one subpopulation) genotypes in  
213 each subpopulation was calculated. The proportion of pure accessions in subpopulations ranged  
214 from 41% to 80% at a 0.7 cutoff value and 10% to 35% at 0.9 cutoff value (Table 3).

215 **Fig 2. Bayesian clustering of whole collection using 8,502 SNP markers in STRUCTURE v.**

216 **2.3.4.** (A) Graphical representation of optimal number of clusters (K) determined by Evanno's  
217 method, where highest Delta K indicate the number of subpopulations. (B) Estimated population  
218 structure (P1 to P6) of 383 canola genotypes on K=6 according to Delta K.

219 **Fig 3. Principal component analysis of SNP diversity based on genetic distance.** Colors  
220 represent different subpopulations identified at K = 6 in figure 2. Genotypes belong to P6 (black  
221 dots) are scattered within different subpopulations.

222 **Fig 4. Phylogenetic tree based on neighbor-joining (NJ) using information from 8,502 SNP**  
223 **markers.** Each branch is color-coded according to membership into the K= 6 subpopulations  
224 identified by structure in figure 2. Subpopulations bear same color as in figure 3.

225

226

227

228

229 **Table 3. Number of pure and admixed individuals per subpopulation.**

| Subpopulations | Total no. of genotypes | 0.7 cutoff       |                 | 0.9 cutoff       |                 |
|----------------|------------------------|------------------|-----------------|------------------|-----------------|
|                |                        | No. of genotypes | % of from total | No. of genotypes | % of from total |
| P1             | 152                    | 89               | 58.6            | 42               | 27.6            |
| P2             | 52                     | 24               | 46.2            | 9                | 17.3            |
| P3             | 98                     | 40               | 40.8            | 14               | 14.3            |
| P4             | 61                     | 30               | 49.2            | 6                | 9.8             |
| P5             | 20                     | 16               | 80.0            | 7                | 35.0            |
| Total          | 383                    | 199              | 52.0            | 78               | 20.4            |

230

### 231 **Population diversity**

232 In all subpopulations, the percentage of polymorphic loci was greater than 75%. It was  
 233 highest in P1 (99%) and lowest in P5 (75%). The diversity ( $H$ ) of the five subpopulations ranged  
 234 from 0.19 (P4 and P5) to 0.25 (P2) with an average of 0.22. The Shannon's information index ( $I$ )  
 235 ranged from 0.31 (P4 and P5) to 0.40 (P2) with an average of 0.34. The Tajima's D value ranged  
 236 from -0.70 (P4) to 0.53 (P1) with an average of 0.13 (Table 4).

237

238 **Table 4. Subpopulation-wise diversity parameters.**

239

| Subpopulations | Polymorphic loci (%) | $N_a$ <sup>a</sup> | $N_e$ <sup>b</sup> | $I$ <sup>c</sup> | $H$ <sup>d</sup> | $U_h$ <sup>e</sup> | Tajima's D* |
|----------------|----------------------|--------------------|--------------------|------------------|------------------|--------------------|-------------|
| P1             | 99.12                | 1.99               | 1.32               | 0.35             | 0.21             | 0.21               | 0.53        |
| P2             | 94.32                | 1.94               | 1.40               | 0.40             | 0.25             | 0.25               | 0.30        |
| P3             | 96.98                | 1.97               | 1.35               | 0.36             | 0.22             | 0.23               | 0.30        |
| P4             | 80.67                | 1.81               | 1.30               | 0.31             | 0.19             | 0.19               | -0.70       |
| P5             | 75.25                | 1.75               | 1.31               | 0.31             | 0.19             | 0.20               | 0.23        |
| Mean           | 89.27                | 1.89               | 1.34               | 0.34             | 0.22             | 0.22               | 0.13        |

240 <sup>a</sup> No. of different alleles, <sup>b</sup> No. of effective alleles, <sup>c</sup> Shannon's information index

241 <sup>d</sup> Diversity, <sup>e</sup> Unbiased diversity. SE (standard error) was zero in all cases. Indices calculated  
 242 using 8191 SNPs with GenAlex v. 6.5. \* was calculated with 1000 permutations.

243

## 244 Population genetic differentiation

245 The analysis of molecular variance (AMOVA) revealed that variance among  
246 subpopulations covered 24% of total variation whereas the remaining 76% of total variation  
247 accounted for variance among individuals within subpopulations (Table 5) with a  $F_{st}$  and  $Nm$   
248 value of 0.24 and 1.28, respectively.

249 **Table 5. Summary of AMOVA.**

| 251 Sources of variation  | 252 d.f. | 253 Sum of squares | 254 Variance components | 255 % of variation | 256 $F_{st}$ | 257 Nm |
|---------------------------|----------|--------------------|-------------------------|--------------------|--------------|--------|
| 258 Among subpopulations  | 4        | 130814.6           | 228.5***                | 23.5               | 0.24         | 1.28   |
| 259 Within subpopulations | 761      | 565699.6           | 743.4                   | 76.5               |              |        |
| 260 Total                 | 765      | 696514.1           | 971.9                   |                    |              |        |

261 \*\*\* indicates  $p < 0.001$  for 1023 permutations

262 All pairwise  $F_{st}$  comparisons between subpopulations were significant ( $p < 0.01$ ). All  
263 combinations showed a great degree of divergence ( $F_{st} > 0.20$ ) (Wright 1943), except  
264 combinations P3 and P4 (0.11), P1 and P2 (0.19). The pairwise  $F_{st} > 0.30$  was observed between  
265 P1 and P5, P3 and P5, P4 and P5 (Table 6).

266 **Table 6. Genetic differentiation among subpopulations.**

|    | Subpopulation pairwise $F_{st}$ |        |        |        |    |
|----|---------------------------------|--------|--------|--------|----|
|    | P1                              | P2     | P3     | P4     | P5 |
| P1 | 0                               |        |        |        |    |
| P2 | 0.19**                          | 0      |        |        |    |
| P3 | 0.25**                          | 0.24** | 0      |        |    |
| P4 | 0.21**                          | 0.24** | 0.11** | 0      |    |
| P5 | 0.34**                          | 0.24** | 0.34** | 0.39** | 0  |

267 Diagonal values are pairwise  $F_{st}$  comparisons, performing 1000 permutations using Arlequin v.

268 3.5. \*\*indicates  $p < 0.01$

267 We performed kinship (IBS) analysis to facilitate the individual genotype selection for  
268 desirable cross combinations (Fig 5, S5 Table). In whole collection, the IBS coefficients ranged  
269 from 1.21 to 1.94. The average coancestry between any two canola genotypes was 1.47. The P2  
270 contained almost 50% of total genotypic pairs having IBS coefficients less than 1.50 whereas  
271 this portion was comparatively lower in other subpopulations (Table 7, S1 Fig).

272  
273 **Fig 5. Heatmap of kinship matrix of entire collection.**

274  
275 **Table 7. Summary of subpopulation-wise kinship (IBS) matrix.**

| Subpopulations                                | Whole collection | P1         | P2         | P3         | P4        | P5        |
|-----------------------------------------------|------------------|------------|------------|------------|-----------|-----------|
| IBS coefficients range                        | 1.21- 1.94       | 1.40- 1.94 | 1.27- 1.93 | 1.29- 1.93 | 1.46-1.94 | 1.35-1.92 |
| Mean of IBS coefficients                      | 1.47             | 1.58       | 1.49       | 1.55       | 1.62      | 1.60      |
| Pairs having $\leq 1.50$ IBS coefficients (%) | 63.9             | 9.6        | 50.7       | 21.7       | 1.1       | 18.0      |
| Pairs having $> 1.50$ IBS coefficients (%)    | 36.1             | 90.4       | 49.3       | 78.3       | 98.9      | 82.0      |

276  
277 We also performed correlation analysis between mean pairwise relatedness (IBS  
278 coefficients) among individuals within subpopulation and Shannon's information index ( $I$ ),  
279 diversity ( $H$ ). The  $I$  and  $H$  were significantly and negatively correlated with relatedness ( $r = -$   
280  $0.97$ ,  $-0.98$ , and  $p < 0.01$ ), respectively.

## 281 **Linkage disequilibrium pattern**

282 The linkage disequilibrium (LD) pattern was investigated across the entire collection,  
283 each subpopulation, genome, and chromosome-wise. LD =  $r^2$  values decreased with the increase  
284 of distances. In all cases, mean LD was high ( $r^2 > 0.22$ ) at short distance bin (0-2 kb) and  
285 declined with increasing bin distance (S6 Table). In the entire collection considering both A and  
286 C genome, the mean linked LD, mean unlinked LD and loci pair under linked LD was 0.44, 0.02  
287 and 1.81%, respectively. The mean linked LD was similar in P3 and P4 ( $r^2 = 0.45$ ), lower in P2

288 ( $r^2 = 0.41$ ) and higher in P1 ( $r^2 = 0.48$ ). The loci pair in linked LD was higher in P5 (8.76%) and  
289 lowest in P1 (1.52%). The mean linked LD, mean LD and loci pair under linked LD was always  
290 higher in all cases in case of C genome than that of A genome (Table 8). We also calculated the  
291 LD decay rate. In the whole collection, LD decayed to its half maximum within < 45 kb distance  
292 for whole genome, < 21 kb for A genome, and < 93 kb for C genome. In all subpopulations, the  
293 distance for LD decay to its half maximum was always higher for C genome than A genome.  
294 Each chromosome showed differential rate of LD decay (S2 and S3 Fig). LD persisted the  
295 longest in chromosome C1 (348 kb) and C2 (244 kb). The decay distance was shortest in  
296 chromosome A5 (13 kb) and A1 (16 kb) (S6 Table). LD decayed to its half –maximum within <  
297 29 kb for P1, <45 kb for P2, P3, <101 kb for P4, and <120 kb for P5. In all subpopulations LD  
298 persisted also longest in all chromosomes of C genome than that of A genome (Fig 6, S7 Table).

299  
300 **Fig 6. Linkage disequilibrium (LD) differences and decay pattern among subpopulations.**

301  
302  
303  
304  
305  
306  
307  
308  
309  
310  
311  
312  
313  
314  
315  
316  
317  
318  
319  
320  
321  
322

323 **Table 8. Linkage disequilibrium in the studied collection.**  
324

| Subpopulation    | Mean linked LD | Mean unlinked LD | Mean LD | Loci pairs in linked LD (%) | Loci pairs in unlinked LD (%) |
|------------------|----------------|------------------|---------|-----------------------------|-------------------------------|
| AC Genome        |                |                  |         |                             |                               |
| Whole collection | 0.44           | 0.02             | 0.03    | 1.81                        | 98.2                          |
| P1               | 0.48           | 0.01             | 0.02    | 1.52                        | 98.5                          |
| P2               | 0.41           | 0.02             | 0.03    | 2.65                        | 97.4                          |
| P3               | 0.45           | 0.02             | 0.03    | 1.94                        | 98.1                          |
| P4               | 0.45           | 0.02             | 0.04    | 3.98                        | 96.0                          |
| P5               | 0.43           | 0.03             | 0.07    | 8.76                        | 91.2                          |
| A Genome         |                |                  |         |                             |                               |
| Whole collection | 0.33           | 0.02             | 0.02    | 1.34                        | 98.7                          |
| P1               | 0.38           | 0.01             | 0.02    | 1.12                        | 98.9                          |
| P2               | 0.32           | 0.02             | 0.03    | 2.02                        | 98.0                          |
| P3               | 0.36           | 0.02             | 0.02    | 1.41                        | 98.6                          |
| P4               | 0.40           | 0.02             | 0.03    | 3.45                        | 96.6                          |
| P5               | 0.38           | 0.04             | 0.06    | 7.06                        | 92.9                          |
| C Genome         |                |                  |         |                             |                               |
| Whole collection | 0.50           | 0.02             | 0.03    | 2.21                        | 97.8                          |
| P1               | 0.52           | 0.01             | 0.02    | 1.83                        | 98.2                          |
| P2               | 0.46           | 0.02             | 0.04    | 3.27                        | 96.7                          |
| P3               | 0.50           | 0.02             | 0.03    | 2.35                        | 97.7                          |
| P4               | 0.48           | 0.02             | 0.04    | 4.41                        | 95.6                          |
| P5               | 0.46           | 0.03             | 0.08    | 10.57                       | 89.4                          |

325  
326 We also performed haplotype block analysis to investigate LD variation patterns across  
327 whole genome. A total 200 blocks covering 18 Mb out of the 976 Mb anchored *B. napus*  
328 reference genome (31), were identified. A and C genome contained 67 and 133 haplotype blocks,  
329 respectively. The total length of A and C genome specific haplotype blocks were 1.8 Mb and 16  
330 Mb, respectively. The total length of haplotype blocks varied greatly from chromosome to  
331 chromosome. Total haplotype block length varies from 24 Kb on A1 to 901 Kb on A9 in A  
332 genome and in C genome it varies between 40 Kb on C9 to 3,610 Kb on C2 (Table 9). The  
333 subpopulation-specific and common haplotype blocks were shown in supplementary S8 Table.

334



335 **Table 9. Subpopulation-wise number and length of haplotype blocks (HBs) along**  
 336 **chromosomes.**

| Chr.      | Entire panel    |                   | P1              |                   | P2              |                   | P3              |                   | P4              |                   | P5              |                   |
|-----------|-----------------|-------------------|-----------------|-------------------|-----------------|-------------------|-----------------|-------------------|-----------------|-------------------|-----------------|-------------------|
|           | No <sup>a</sup> | Size <sup>b</sup> | No <sup>a</sup> | Size <sup>b</sup> | No <sup>a</sup> | Size <sup>b</sup> | No <sup>a</sup> | Size <sup>b</sup> | No <sup>a</sup> | Size <sup>b</sup> | No <sup>a</sup> | Size <sup>b</sup> |
| A1        | 5               | 24                | 6               | 733               | 2               | 5                 | 6               | 557               | 5               | 2080              | 0               | 0                 |
| A2        | 8               | 80                | 7               | 96                | 1               | 11                | 8               | 654               | 3               | 15                | 0               | 0                 |
| A3        | 6               | 46                | 5               | 29                | 5               | 44                | 8               | 51                | 10              | 927               | 1               | 8                 |
| A4        | 5               | 46                | 1               | 27                | 2               | 17                | 0               | 0                 | 1               | 6                 | 0               | 0                 |
| A5        | 7               | 57                | 2               | 13                | 3               | 503               | 5               | 138               | 5               | 427               | 1               | 1                 |
| A6        | 9               | 308               | 6               | 564               | 4               | 29                | 5               | 52                | 5               | 51                | 0               | 0                 |
| A7        | 8               | 70                | 7               | 72                | 2               | 15                | 7               | 412               | 9               | 1092              | 1               | 13                |
| A8        | 4               | 304               | 1               | 2                 | 3               | 21                | 2               | 234               | 6               | 2654              | 0               | 0                 |
| A9        | 10              | 901               | 7               | 62                | 14              | 1493              | 6               | 64                | 9               | 1393              | 1               | 21                |
| A10       | 5               | 29                | 6               | 50                | 2               | 21                | 1               | 6                 | 5               | 45                | 1               | 1                 |
| C1        | 23              | 3099              | 14              | 3314              | 14              | 4638              | 19              | 2947              | 20              | 4295              | 1               | 14                |
| C2        | 26              | 3611              | 19              | 3141              | 9               | 4503              | 22              | 3756              | 16              | 5237              | 7               | 3594              |
| C3        | 14              | 969               | 13              | 930               | 13              | 1480              | 16              | 1603              | 9               | 1070              | 2               | 192               |
| C4        | 16              | 3440              | 15              | 5351              | 15              | 5330              | 14              | 4502              | 13              | 6063              | 4               | 3989              |
| C5        | 9               | 423               | 8               | 410               | 10              | 516               | 7               | 1148              | 7               | 2679              | 1               | 2                 |
| C6        | 18              | 1204              | 9               | 972               | 7               | 1191              | 13              | 1206              | 15              | 3357              | 3               | 954               |
| C7        | 17              | 2394              | 17              | 2583              | 7               | 70                | 16              | 2479              | 10              | 1414              | 1               | 13                |
| C8        | 4               | 893               | 5               | 865               | 10              | 1289              | 6               | 941               | 7               | 1143              | 1               | 73                |
| C9        | 6               | 41                | 7               | 49                | 4               | 438               | 7               | 223               | 3               | 11                | 1               | 14                |
| AC Genome | 200             | 17938             | 155             | 19264             | 127             | 21615             | 168             | 20975             | 158             | 33956             | 26              | 8888              |
| A Genome  | 67              | 1865              | 48              | 1648              | 38              | 2160              | 48              | 2168              | 58              | 8688              | 5               | 43                |
| C Genome  | 133             | 16073             | 107             | 17616             | 89              | 19455             | 120             | 18807             | 100             | 25267             | 21              | 8845              |

337 <sup>a</sup> The number of haplotype blocks on each chromosome.

338 <sup>b</sup> The total length of haplotype blocks for each chromosome in Kb.

## 339 **Discussion**

340 Genotyping-by-sequencing (29) is one approach to obtain high frequency SNPs. The  
 341 strategy has been used for population genetic studies, association mapping, and proven to be a  
 342 powerful tool to dissect multiple genes/QTL in many plant species (51–53). We obtained  
 343 497,336 unfiltered SNPs markers of which 8,502 high quality SNP marker were used for genetic

344 diversity analysis of 383 genotypes. Delourme et al. (2013) (24) conducted genetic diversity  
345 analysis in *B. napus* using 7,367 SNP markers of 374 genotypes. However, different marker  
346 technologies such as Single Sequence Repeat (SSR), Sequence Related Amplified Polymorphism  
347 (SRAP) markers have been used by other researchers for genetic diversity analysis in *B. napus*.  
348 Chen et al. (2020) (54) used 30 SSR markers, Wu et al. (2014) (55) utilized 45 SSR markers,  
349 Ahmad et al. (2014) (56) used 20 SRAP markers for genetic diversity and population structure  
350 analysis of *B. napus*. Earlier, our group conducted a genetic diversity study of flax using 373  
351 germplasm accessions with 6,200 SNP markers.

352         The SNP markers were distributed throughout 19 chromosomes of *B. napus* and the  
353 marker density was 1 per 99.5 Kbp. This is comparable density to earlier study conducted by  
354 Delourme et al. (2013) (24). Therefore, this marker density provides a sufficient resolution to  
355 accurately estimate genome-wide diversity as well as the extent of LD within the genome. The  
356 high marker density will also help association mapping studies precisely identify a causal  
357 locus/loci or very closely linked loci that can be further used either in MAS or to pinpoint the  
358 causative locus (57).

359         The core collection utilized in this study represents mostly adapted lines from various  
360 breeding programs rather than wild accessions commonly used in diversity studies. Therefore,  
361 sources of variation, markers of interest identified in the collection can be directly used in  
362 breeding programs.

363         We have identified higher frequency of transition SNPs over transversion SNPs that is an  
364 agreement with Bus et al. (2012) (58), Clarke et al. (2013) (59), and Huang et al. (2013) (60) in  
365 *B. napus*. Higher number of transition SNPs over transversion is also reported in other crop  
366 species such as *Hevea brasiliensis* (61), *Camellia sinensis* (62), *Camelina sativa* (63), and *Linum*

367 *usitatissimum* (64). The high number of transition SNPs indicating that this mutation is more  
368 tolerable to natural selection (65).

369 We have calculated the polymorphic information content (PIC) and expected  
370 heterozygosity ( $H_e$ ) for each marker. The PIC indicates the usefulness of any marker for linkage  
371 analysis, and  $H_e$  determines the diversity of haploid markers (66). In our research, the PIC value  
372 is ranged from 0.05 to 0.35 indicating that the markers are moderate or low informative. The  
373 similar lower PIC value (0.1 to 0.35) was reported by Delourme et al. (2013) (24) in *B. napus*.  
374 The lower PIC value was also reported in winter wheat (67), maize (68), flax (64, 69) and rice  
375 (70). The lower PIC value is a result of bi-allelic nature of SNP markers and probable low  
376 mutation rate (71). In our study, the  $H_e$  value of each marker was always greater than  
377 corresponding PIC value indicating an average lower allele frequency in our population (66).

## 378 **Population structure and diversity**

379 Multiple population-based analyses, including population structure, PCA and NJ tree  
380 analysis split the core collection into five distinct clusters. Previously, three clusters have been  
381 reported based on winter, spring and semi-winter growth habit types of *B. napus* (20, 24–26, 72–  
382 74). Our analysis showed a clear trend of the five clusters belonging to winter type (P1), semi-  
383 winter type (P2), spring type of mixed origin (P3), spring type developed at NDSU (P4), and  
384 rutabaga type (P5) growth habits. Our finding showed strong agreement with other studies to  
385 separate winter, semi-winter and spring types. Moreover, we could separate the rutabaga types  
386 and divided the spring type into two groups: American origin and the rest of other countries  
387 origin. This additional cluster added new information to select germplasm from different  
388 subpopulation for increasing genetic diversity in canola breeding program.

389 We have identified a moderate diversity (average  $H = 0.22$ ) within the subpopulations. *B.*  
390 *napus* is capable of self-pollination, and little cross pollination may be occurred by insect. Being  
391 a mostly self-pollinated crop a low to moderate subpopulation diversity in *B. napus* is expected.  
392 Low to moderate diversity was also found in previous studies (75–77). Along with the  
393 reproduction system, one needs to look at evolution and domestication history for explaining low  
394 to moderate levels of diversity in *B. napus*. This allopolyploid species originated at  
395 Mediterranean coast as a result of a natural cross between *B. rapa* and *B. oleracea* which  
396 occurred approximately 0.12 -1.37 million years ago (78, 79). The domestication of *B. napus*  
397 occurred very recently, around 400 years ago with the first rapeseed being most likely a semi-  
398 winter type due to the mild climate in the region (72, 80). Later on, European growers developed  
399 the winter and spring type Brassicas through selection for cold hardiness or early flowering to  
400 expand its cultivation in further North in the last century (81). Therefore, the low to moderate  
401 diversity in winter and spring *B. napus* can be mostly explained by a recent history of the  
402 species, followed by infrequent exchange of genetic material with other Brassicas (24), as well as  
403 by the traditional breeding practices selecting for only few phenotypes. In our study, the more  
404 diversity in semi-winter type (P2,  $H= 0.25$ ) than winter (P1,  $H= 0.21$ ) and spring (P4,  $H= 0.19$ )  
405 type is supported by its domestication history. We have seen a homogeneity of the diversity  
406 indices of different subpopulations indicating that the species is stable enough to avoid the  
407 natural loss of genetic variability by genetic drift (82). The  $Nm$  value was greater than one, which  
408 indicates that there was enough gene flow among semi-winter, winter and spring types. These  
409 findings also support the evolution of winter and spring types from semi-winter type. In this  
410 research, Tajima's D value was calculated to identify different subpopulations with availability  
411 or scarcity of rare alleles (83). P4 (spring type originated at NDSU, USA) showed a negative

412 Tajima's D value indicating presence of more rare and unique alleles and recent expansion of  
413 this subpopulation compared to the other subpopulations (84). Recently, the NDSU canola  
414 breeding program developed the P4 advanced breeding lines through crossing different genetic  
415 resources including winter, spring and semi winter types and subsequent selection. Therefore, the  
416 P4 displayed an abundance of rare alleles. The subpopulation P1, P2, P3, and P5 showed positive  
417 Tajima's D value indicating an excess of intermediate frequency alleles, which may be caused by  
418 balancing selection, population bottleneck, or population subdivision. Previously, negative  
419 Tajima's D values were found in spring and winter type *B. napus* accessions (74). The negative  
420 correlation between diversity indices ( $H$  and  $I$ ) and relatedness (average IBS coefficients)  
421 indicates that inbreeding and genetic drift play a significant role in reducing genetic variability in  
422 the studied population which results in increased differentiation among sub-populations. Similar  
423 phenomenon was also found in flax (64) and *Arapaima gigas* species (85).

424 Parent selection for crossing from diverged population will allow us to create a new  
425 population with increased genetic diversity and transgressive segregation, and eventually will  
426 increase genetic gain. Pairwise  $F_{st}$  statistic, a parameter describing population structure  
427 differentiation and the degree of divergence among populations (86), was estimated among five  
428 subpopulations. In the present study all pairwise  $F_{st}$  values comprising both low and high values,  
429 were statistically significant. Similar type results were also found in other studies (74, 87–89).  
430 Lower pairwise  $F_{st}$  (0.11) was identified between spring type originated in USA (P4) and spring  
431 type originated in other countries (P3). This is reasonably justified as both subpopulations  
432 comprise of spring type genotypes and germplasm exchanged occurred between USA and other  
433 countries. It also indicating that we will not get higher genetic diversity in population if we use  
434 only spring types in the crossing program. But this combination is good for accumulating

435 specific elite trait if the targeted trait is found in members of one and missing from the members  
436 of another group. We found spring type (P3 and P4) genotypes are greatly divergent ( $F_{st} > 0.20$ )  
437 from winter and semi-winter type (P1 and P2) genotypes. Utilization of genotypes from these  
438 group in crossing program will broaden the genetic base of developed population results in high  
439 heterosis. This potentiality has already been proved as hybrids between the Chinese semi-winter  
440 and European (including Canada) spring type exhibited high heterosis for seed yield (90). The P5  
441 (rutabaga type) showed the higher  $F_{st}$  with other subpopulations such as the highest  $F_{st}$  was  
442 observed between P5 and P4 (NDSU spring type) followed by P3 (other spring type), P1 (winter  
443 type) and P2 (semi-winter type). This outcome clearly shows that rutabaga is genetically distinct  
444 from spring and winter type canola which is confirmed by previous studies (72, 73, 91). This  
445 distinctness of rutabaga can be exploited through heterosis breeding. Several previous studies  
446 have already showed rutabaga as a potential gene pool for the improvement of spring canola (92,  
447 93). NDSU canola breeding program also utilized winter and rutabaga types in the breeding  
448 program for increasing genetic diversity and for improvement of spring canola.

449 Crossing among genotypes within subpopulations is also useful as variation among  
450 individuals within subpopulations is greater than that among subpopulations, which was revealed  
451 by AMOVA. This finding is also in agreement with the previous findings (54, 77, 94, 95). In this  
452 case subpopulations P2, P3 and P1 showing high diversity ( $H > 0.20$ ) could be utilized for  
453 cultivar development. Structure, NJ tree and PC analysis revealed that all subpopulations  
454 contained both pure (non-hybrid) as well as admixed (share SNPs from different subpopulation)  
455 genotypes. For broadening genetic base of population, pure genotypes should be crossed. But for  
456 improving or introgression of specific traits, admixed genotypes could also be crossed which will  
457 reduce the population size required for phenotypic screening. However, population diversity

458 indicates the level of similarity or dissimilarity based on alleles that not necessarily come from  
459 the same parent or ancestor, this tends to inflate the real differentiation between any two pair of  
460 individuals (96). Since a breeder would like to combine positive alleles that historically never  
461 have been combined, IBS values are good to decide what individuals will be crossed. Low IBS is  
462 the best. But, IBS values in self-pollinated crops tends to be higher than that in cross-pollinated  
463 crops as heterozygosity reduces the probability of two alleles at a locus of being identical by  
464 state (97). In our study, most of the genotypes had weak relatedness as approximately 64% of  
465 pairwise coancestry ranged from 1.21 to 1.50. Crossing among genotypes from subpopulation P2  
466 will demonstrate more diversity, than that of other subpopulations, as most genotypic  
467 combinations of P2 shows low IBS coefficients than others. This finding is in line with the  
468 evolutionary history of *B. napus* where semi-winter type is the base population containing more  
469 divergence. Gradually this diversity is narrowed down in P3 (spring type, mixed origin) and P1  
470 (winter type), because genotypic pairs belong to P3 and P1 having high IBS values evolved from  
471 semi-winter type (81). Subpopulation P4 exhibited highest number of pairs having  $IBS > 1.5$ ,  
472 which is obvious as these genotypes are advanced breeding lines developed from crossing of  
473 same set of parents in different combinations. Genotypic pairs of P5 (rutabaga type) also showed  
474 high coancestry which is may be due to the duplicates. We could discard the duplicates during  
475 the crossing program.

## 476 **Linkage Disequilibrium**

477 Linkage disequilibrium can be defined as the correlation among polymorphisms in a  
478 given population (98). The strength of association mapping relies on the degree of LD between  
479 the genotyped marker and the functional variant. Linkage disequilibrium analysis provides

480 insight into the history of both natural and artificial selection (breeding) and can give valuable  
481 guidance to breeders seeking to diversify crop gene pools (20). SNPs in strong LD are organized  
482 into haplotype blocks which can extend even up to few Mb based on the species and the  
483 population used. Genetic variation across the genome is defined by these haplotype blocks.  
484 Haplotypes which are subpopulation-specific are defined by various demographic parameters  
485 like population structure, domestication, selection in combination with mutation and  
486 recombination events. Conserved haplotype structure can then be used for the identification and  
487 characterization of functionally important genomic regions during evolution and/or selection  
488 (99). Also, the extent of LD needs to be quantified across the genome at high resolution (down to  
489 approximately 1 Kbp) (100). The information is important for choosing crossing schemes,  
490 association studies and germplasm preservation strategies (101–104).

491         We used markers from across the genome to quantify the LD for the core collection. Low  
492 level of LD was evident for each individual subpopulation in A, C and whole genome. The low  
493 level of LD can be due to multiple factors. First of all, canola is a partially outcrossing species  
494 with an average of 21-30 % of cross pollination (105–107). The outcrossing occurring in canola  
495 leads to more recombination and to a breakdown of haplotype blocks. Secondly, the ancestral  
496 history of canola is limited in comparison with other crops, such as rice, common bean, wheat  
497 and corn, restricting the selection of desirable haplotypes during the evolution. In other words,  
498 there was no adaptation or domestication pressure on the species, which would lead towards  
499 positive selection. Third, the only selection pressure imposed on the species for a relatively short  
500 time was breeding. However, the breeding practices were biased towards selection of only few  
501 phenotypes. Additionally, the short period of time under selection pressure might have not been  
502 sufficient to select favorable haplotypes in the genome. Fourth, since canola cultivars with



503 different growth habits are compatible there has been always gene flow present between them  
504 contributing to the low level of LD. The  $N_m > 1$  was observed in this study, which supports this  
505 gene flow. Finally, the restriction enzyme used to develop the libraries for sequencing of the core  
506 collection helped in identification of SNPs largely residing in genic regions, which are prone to  
507 high recombination, contributing to the low level of LD.

508         In this study, we have identified that the LD decay in *B. napus* varied across  
509 chromosomes of both A and C genomes. In addition, LD in C genome decayed much slower than  
510 A genome. C genome also contained larger haplotype blocks than A genome. This LD patterns  
511 are consistent with previous findings (20, 27, 108–110). The slower LD decay and presence of  
512 long haplotype blocks in C genome indicates that high level of gene conservation could have  
513 resulted from limited natural recombination or could be exchanged of large chromosomal  
514 segment during evolution. In the whole genome, presence of subpopulation specific haplotype  
515 blocks suggests that these regions had been experienced selection pressure for specific  
516 geographic regions adaptation. In all subpopulations, presence of shorter haplotype blocks in A  
517 genome than C genome reveals that *B. rapa* progenitor of *B. napus* containing A genome, which  
518 has been used as oilseed crop and probably being used in hybridization process. Sharing  
519 haplotype blocks by different subpopulations specially in C genome also confirms its conserved  
520 nature. The low level of LD or haplotype blocks has implications for association mapping and a  
521 proper experimentation design is necessary for utilizing a reduced set of markers by tagging  
522 major haplotypes (111). Though low LD requires more markers to pinpoint the location of  
523 various QTL, but once a marker is found to be significantly associated with a phenotype, there  
524 might be a higher probability of identifying the casual gene.

525

## 526 **Conclusions**

527           This study provided a new insight to select the best parents in crossing plan to maximize  
528 genetic gain in the population. The population structure analysis showed a clear geographic and  
529 growth habit related clustering. Low LD values indicate that our collection is a valuable resource  
530 for prospect association mapping endeavors. The genetic diversity of the core collection of *B.*  
531 *napus* was low. Breeding efforts will need to address this issue in order to generate future hardy  
532 and high yielding varieties with resistance to many abiotic and biotic stresses. The rutabaga type  
533 showed the highest genetic divergence with spring and winter types accessions. Therefore, the  
534 breeding strategies to increase the genetic diversity may include generating population from  
535 rutabaga and spring crosses, or using rutabaga and winter crosses.

536

## 537 **Acknowledgements**

538           The authors thank Mr. Andrew Ross (Department of Plant Sciences, NDSU, Fargo, ND)  
539 for his help in planting and maintaining the plants in the greenhouse and in the field.

540

541

542

543

544

545

## 546 **References**

- 547
- 548 1. Nagaharu U. Genome-analysis in Brassica with special reference to the experimental  
549 formation of *B. napus* and peculiar mode of fertilization. Japanese J Bot. 1935; 7: 389-  
550 452.
- 551 2. USDA Foreign Agricultural Service. Oilseeds: World markets and trade reports. 2020;  
552 <https://apps.fas.usda.gov/psdonline/circulars/oilseeds.pdf>. [Accessed February 20,  
553 2020].
- 554 3. Connor WE. Importance of n-3 fatty acids in health and disease. American Journal of  
555 Clinical Nutrition. 2000; 1: 171S-175S. doi:10.1093/ajcn/71.1.171s.
- 556 4. Swanepoel N, Robinson PH, Erasmus LJ. Effects of ruminally protected methionine  
557 and/or phenylalanine on performance of high producing Holstein cows fed rations with  
558 very high levels of canola meal. Anim Feed Sci Technol. 2015; 205:10–22. doi:  
559 10.1016/j.anifeedsci.2015.04.002.
- 560 5. NASS. National Agricultural Statistics Service. 2020; <https://www.nass.usda.gov>.  
561 [Accessed February 20, 2020].
- 562 6. Rahman M, Mcclean P. Genetic analysis on flowering time and root system in  
563 *brassica napus* L. Crop Sci. 2013; 53: 141-147. doi:10.2135/cropsci2012.02.0095.
- 564 7. Wang N, Qian W, Suppanz I, Wei L, Mao B, Long Y, et al. Flowering time variation  
565 in oilseed rape (*Brassica napus* L.) is associated with allelic variation in the FRIGIDA  
566 homologue BnaA.FRI.a. J Exp Bot. 2011; 62: 5641–5658. doi:10.1093/jxb/err249.
- 567 8. Jaeger KE, Graf A, Wigge PA. The control of flowering in time and space. Journal of  
568 experimental botany. 2006; 57: 3415–3418. doi:10.1093/jxb/erl159.

- 569 9. Jung C, Müller AE. Flowering time control and applications in plant breeding. Trends  
570 in Plant Science. 2009; 14: 563–573. doi:10.1016/j.tplants.2009.07.005.
- 571 10. Srikanth A, Schmid M. Regulation of flowering time: All roads lead to Rome. Cellular  
572 and Molecular Life Sciences. 2011; 68: 2013–2037. doi:10.1007/s00018-011-0673-y.
- 573 11. Wigge PA. Ambient temperature signalling in plants. Current Opinion in Plant  
574 Biology. 2013; 16: 661–666. doi:10.1016/j.pbi.2013.08.004.
- 575 12. Preston JC, Sandve SR. Adaptation to seasonality and the winter freeze. Frontiers in  
576 Plant Science. 2013; 4:167. doi:10.3389/fpls.2013.00167.
- 577 13. Song J, Irwin J, Dean C. Remembering the prolonged cold of winter. Current Biology.  
578 2013; 23: R807–R811. doi:10.1016/j.cub.2013.07.027.
- 579 14. Pak H, Guo Y, Chen M, Chen K, Li Y, Hua S, et al. The effect of exogenous methyl  
580 jasmonate on the flowering time, floral organ morphology, and transcript levels of a  
581 group of genes implicated in the development of oilseed rape flowers (*Brassica napus*  
582 L.). Planta. 2009; 231: 79–91. doi:10.1007/s00425-009-1029-9.
- 583 15. de Montaigu A, Tóth R, Coupland G. Plant development goes like clockwork. Trends  
584 in Genetics. 2010; 26: 296–306. doi:10.1016/j.tig.2010.04.003.
- 585 16. Wang JW, Czech B, Weigel D. miR156-Regulated SPL Transcription Factors Define  
586 an Endogenous Flowering Pathway in *Arabidopsis thaliana*. Cell. 2009; 138: 738-749.  
587 doi:10.1016/j.cell.2009.06.014.
- 588 17. Zou X, Suppanz I, Raman H, Hou J, Wang J, Long Y, et al. Comparative Analysis of  
589 FLC Homologues in Brassicaceae Provides Insight into Their Role in the Evolution of  
590 Oilseed Rape. PLoS One. 2012; 7: e45751. doi:10.1371/journal.pone.0045751.

- 591 18. Kippes N, Debernardi JM, Vasquez-Gross HA, Akpinar BA, Budak H, Kato K, et al.  
592 Identification of the VERNALIZATION 4 gene reveals the origin of spring growth  
593 habit in ancient wheats from South Asia. *Proc Natl Acad Sci U S A*. 2015; 112:  
594 E5401-E5410. doi:10.1073/pnas.1514883112.
- 595 19. Rahman H. Review: Breeding spring canola (*Brassica napus* L.) by the use of exotic  
596 germplasm. *Can J Plant Sci*. 2013; 93: 363–373. doi:10.4141/CJPS2012-074.
- 597 20. Qian L, Qian W, Snowdon RJ. Sub-genomic selection patterns as a signature of  
598 breeding in the allopolyploid *Brassica napus* genome. *BMC Genomics*. 2014; 15:1170.  
599 doi:10.1186/1471-2164-15-1170.
- 600 21. Girke A, Schierholt A, Becker HC. Extending the rapeseed genepool with  
601 resynthesized *Brassica napus* L. I: Genetic diversity. *Genet Resour Crop Evol*. 2012;  
602 59: 1441–1447. doi:10.1007/s10722-011-9772-8.
- 603 22. Iqbal MJ, Mamidi S, Ahsan R, Kianian SF, Coyne CJ, Hamama AA, et al. Population  
604 structure and linkage disequilibrium in *Lupinus albus* L. germplasm and its  
605 implication for association mapping. *Theor Appl Genet*. 2012; 125: 517–530.  
606 doi:10.1007/s00122-012-1850-6.
- 607 23. Gurung S, Mamidi S, Bonman JM, Xiong M, Brown-Guedira G, Adhikari TB.  
608 Genome-wide association study reveals novel quantitative trait loci associated with  
609 resistance to multiple leaf spot diseases of spring wheat. *PLoS One*. 2014; 9: e108179.  
610 doi:10.1371/journal.pone.0108179.
- 611 24. Delourme R, Falentin C, Fomeju BF, Boillot M, Lassalle G, André I, et al. High-  
612 density SNP-based genetic map development and linkage disequilibrium assessment in  
613 *Brassica napus* L. *BMC Genomics*. 2013; 14:120. doi:10.1186/1471-2164-14-120.

- 614 25. Li F, Chen B, Xu K, Wu J, Song W, Bancroft I, et al. Genome-wide association study  
615 dissects the genetic architecture of seed weight and seed quality in rapeseed (*Brassica*  
616 *napus* L.). *DNA Res.* 2014; 21: 355–367. doi:10.1093/dnares/dsu002.
- 617 26. Raman H, Dalton-Morgan J, Diffey S, Raman R, Alamery S, Edwards D, et al. SNP  
618 markers-based map construction and genome-wide linkage analysis in *Brassica napus*.  
619 *Plant Biotechnol J.* 2014; 12: 851–860. doi:10.1111/pbi.12186.
- 620 27. Wang N, Li F, Chen B, Xu K, Yan G, Qiao J, et al. Genome-wide investigation of  
621 genetic changes during modern breeding of *Brassica napus*. *Theor Appl Genet.* 2014;  
622 127: 1817–1829. doi:10.1007/s00122-014-2343-6.
- 623 28. Voss-Fels K, Frisch M, Qian L, Kontowski S, Friedt W, Gottwald S, et al.  
624 Subgenomic Diversity Patterns Caused by Directional Selection in Bread Wheat Gene  
625 Pools. *Plant Genome.* 2015; 8: 1-13. doi:10.3835/plantgenome2015.03.0013.
- 626 29. Elshire RJ, Glaubitz JC, Sun Q, Poland JA, Kawamoto K, Buckler ES, et al. A robust,  
627 simple genotyping-by-sequencing (GBS) approach for high diversity species. *PLoS*  
628 *One.* 2011; 6(5):e19379. doi: 10.1371/journal.pone.0019379.
- 629 30. Glaubitz JC, Casstevens TM, Lu F, Harriman J, Elshire RJ, Sun Q, et al. TASSEL-  
630 GBS: a high capacity genotyping by sequencing analysis pipeline. *PLoS One.* 2014;  
631 9(2): e90346. doi:10.1371/journal.pone.0090346.
- 632 31. Sun F, Fan G, Hu Q, Zhou Y, Guan M, Tong C, et al. The high-quality genome of  
633 *Brassica napus* cultivar ‘ZS 11’ reveals the introgression history in semi-winter  
634 morphotype. *Plant J.* 2017; 92(3):452–68. doi:10.1111/tpj.13669.
- 635 32. Langmead B, Salzberg SL. Fast gapped-read alignment with Bowtie 2. *Nat Methods.*  
636 2012; 9(4): 357-359. doi:10.1038/nmeth.1923.

- 637 33. Danecek P, Auton A, Abecasis G, Albers CA, Banks E, DePristo MA, et al. The  
638 variant call format and VCFtools. *Bioinformatics*. 2011; 27(15):2156–8.  
639 doi:10.1093/bioinformatics/btr330.
- 640 34. Bradbury PJ, Zhang Z, Kroon DE, Casstevens TM, Ramdoss Y, Buckler ES.  
641 TASSEL: software for association mapping of complex traits in diverse samples.  
642 *Bioinformatics*. 2007; 23(19):2633–5. doi:10.1093/bioinformatics/btm308.
- 643 35. Pritchard JK, Stephens M, Donnelly P. Inference of population structure using  
644 multilocus genotype data. *Genetics*. 2000; 155(2): 945–59.
- 645 36. Evanno G, Regnaut S, Goudet J. Detecting the number of clusters of individuals using  
646 the software STRUCTURE: a simulation study. *Mol Ecol*. 2005; 14(8):2611–20.
- 647 37. Earl DA, vonHoldt BM. STRUCTURE HARVESTER: A website and program for  
648 visualizing STRUCTURE output and implementing the Evanno method. *Conserv  
649 Genet Resour*. 2012; 4: 359–361. doi:10.1007/s12686-011-9548-7.
- 650 38. Jakobsson M, Rosenberg NA. CLUMPP: a cluster matching and permutation program  
651 for dealing with label switching and multimodality in analysis of population structure.  
652 *Bioinformatics*. 2007; 23(14):1801–6.
- 653 39. Ramasamy RK, Ramasamy S, Bindroo BB, Naik VG. STRUCTURE PLOT: a  
654 program for drawing elegant STRUCTURE bar plots in user friendly interface.  
655 *Springerplus*. 2014; 3(1):431. doi:10.1186/2193-1801-3-431.
- 656 40. Kumar S, Stecher G, Li M, Knyaz C, Tamura K. MEGA X: molecular evolutionary  
657 genetics analysis across computing platforms. *Mol Biol Evol*. 2018; 35(6):1547–9.
- 658 41. Rambaut A, FigTree V. 1.4. 4. [Internet]. 2018; [Available from:  
659 <http://tree.bio.ed.ac.uk/software/figtree>]

- 660 42. Excoffier L, Lischer HEL. Arlequin suite ver 3.5: a new series of programs to perform  
661 population genetics analyses under Linux and Windows. *Mol Ecol Resour.* 2010;  
662 10(3): 564–7.
- 663 43. Peakall R, Smouse PE. GenAIEx 6.5: genetic analysis in Excel. Population genetic  
664 software for teaching and research—an update. *Bioinformatics* [Internet]. 2012 Jul 20;  
665 28(19):2537–9. Available from: <https://doi.org/10.1093/bioinformatics/bts460>
- 666 44. Slate J, Marshall T, Pemberton J. A retrospective assessment of the accuracy of the  
667 paternity inference program CERVUS. *Mol Ecol.* 2000; 9(6):801–8.
- 668 45. Kim B, Beavis WD. Numericware i: Identical by State Matrix Calculator. *Evol*  
669 *Bioinforma.* 2017; 13:1176934316688663.
- 670 46. Gu Z, Eils R, Schlesner M. Complex heatmaps reveal patterns and correlations in  
671 multidimensional genomic data. *Bioinformatics.* 2016; 32(18): 2847–9.
- 672 47. R Core Team. R: A Language and Environment for Statistical Computing [Internet].  
673 Vienna, Austria; 2019. Available from: <https://www.r-project.org/>
- 674 48. Zhang C, Dong SS, Xu JY, He WM, Yang TL. PopLDdecay: A fast and effective tool  
675 for linkage disequilibrium decay analysis based on variant call format files.  
676 *Bioinformatics.* 2019; 35: 1786-1788. doi:10.1093/bioinformatics/bty875.
- 677 49. Purcell S, Neale B, Todd-Brown K, Thomas L, Ferreira MAR, Bender D, et al.  
678 PLINK: A tool set for whole-genome association and population-based linkage  
679 analyses. *Am J Hum Genet.* 2007; 81: 559-575. doi:10.1086/519795.
- 680 50. Gabriel SB, Schaffner SF, Nguyen H, Moore JM, Roy J, Blumenstiel B, et al. The  
681 structure of haplotype blocks in the human genome. *Science.* 2002; 296: 2225-2229.  
682 doi:10.1126/science.1069424.



- 683 51. Ganal MW, Durstewitz G, Polley A, Bérard A, Buckler ES, Charcosset A, et al. A  
684 large maize (*zea mays* L.) SNP genotyping array: Development and germplasm  
685 genotyping, and genetic mapping to compare with the B73 reference genome. *PLoS*  
686 *One*. 2011; 6: e28334. doi:10.1371/journal.pone.0028334.
- 687 52. Riedelsheimer C, Lisec J, Czedik-Eysenberg A, Sulpice R, Flis A, Grieder C, et al.  
688 Genome-wide association mapping of leaf metabolic profiles for dissecting complex  
689 traits in maize. *Proc Natl Acad Sci U S A*. 2012; 109: 8872–8877.  
690 doi:10.1073/pnas.1120813109.
- 691 53. Mandel JR, Nambeesan S, Bowers JE, Marek LF, Ebert D, Rieseberg LH, et al.  
692 Association Mapping and the Genomic Consequences of Selection in Sunflower. *PLoS*  
693 *Genet*. 2013; 9: e1003378. doi:10.1371/journal.pgen.1003378.
- 694 54. Chen R, Shimono A, Aono M, Nakajima N, Ohsawa R, Yoshioka Y. Genetic diversity  
695 and population structure of feral rapeseed (*Brassica napus* L.) in Japan. *PLoS One*.  
696 2020; 15: e0227990. doi:10.1371/journal.pone.0227990.
- 697 55. Wu J, Li F, Xu K, Gao G, Chen B, Yan G, et al. Assessing and broadening genetic  
698 diversity of a rapeseed germplasm collection. *Breed Sci*. 2014; 64(4): 321–30.
- 699 56. Ahmad R, Quiros CF, Rahman H, Swati ZA, others. Genetic diversity analyses of  
700 *Brassica napus* accessions using SRAP molecular markers. *Plant Genet Resour*. 2014;  
701 12(1):14.
- 702 57. Rafalski A. Applications of single nucleotide polymorphisms in crop genetics. *Current*  
703 *Opinion in Plant Biology*. 2002; 5: 94–100. doi:10.1016/S1369-5266(02)00240-6.

- 704 58. Bus A, Hecht J, Huettel B, Reinhardt R, Stich B. High-throughput polymorphism  
705 detection and genotyping in *Brassica napus* using next-generation RAD sequencing.  
706 BMC Genomics. 2012; 13(1):1–11.
- 707 59. Clarke WE, Parkin IA, Gajardo HA, Gerhardt DJ, Higgins E, Sidebottom C, et al.  
708 Genomic DNA enrichment using sequence capture microarrays: a novel approach to  
709 discover sequence nucleotide polymorphisms (SNP) in *Brassica napus* L. PLoS One.  
710 2013; 8(12):e81992.
- 711 60. Huang S, Deng L, Guan M, Li J, Lu K, Wang H, et al. Identification of genome-wide  
712 single nucleotide polymorphisms in allopolyploid crop *Brassica napus*. BMC  
713 Genomics. 2013; 14(1):717.
- 714 61. Mantello CC, Cardoso-Silva CB, da Silva CC, de Souza LM, Junior EJS, de Souza  
715 Gonçalves P, et al. De novo assembly and transcriptome analysis of the rubber tree  
716 (*Hevea brasiliensis*) and SNP markers development for rubber biosynthesis pathways.  
717 PLoS One. 2014; 9(7):e102665.
- 718 62. Yang H, Wei C-L, Liu H-W, Wu J-L, Li Z-G, Zhang L, et al. Genetic divergence  
719 between *Camellia sinensis* and its wild relatives revealed via genome-wide SNPs from  
720 RAD sequencing. PLoS One. 2016; 11(3):e0151424.
- 721 63. Luo Z, Brock J, Dyer JM, Kutchan T, Schachtman D, Augustin M, et al. Genetic  
722 diversity and population structure of a *Camelina sativa* spring panel. Front Plant Sci.  
723 2019; 10:184. doi:10.3389/fpls.2019.00184.
- 724 64. Hoque A, Fiedler JD, Rahman M. Genetic diversity analysis of a flax (*Linum*  
725 *usitatissimum* L.) global collection. BMC Genomics. 2020; 21:557.  
726 doi:10.1186/s12864-020-06922-2.

- 727 65. Luo Z, Iaffaldano BJ, Zhuang X, Fresnedo-Ramirez J, Cornish K. Analysis of the first  
728 *Taraxacum kok-saghyz* transcriptome reveals potential rubber yield related SNPs. *Sci*  
729 *Rep.* 2017; 7(1): 9939.
- 730 66. Shete S, Tiwari H, Elston RC. On estimating the heterozygosity and polymorphism  
731 information content value. *Theor Popul Biol.* 2000; 57(3): 265–71.
- 732 67. Eltaher S, Sallam A, Belamkar V, Emara HA, Nower AA, Salem KFM, et al. Genetic  
733 diversity and population structure of F3: 6 nebraska winter wheat genotypes using  
734 genotyping-by-sequencing. *Front Genet.* 2018; 9:76. doi:10.3389/fgene.2018.00076.
- 735 68. Ajala SO, Olayiwola MO, Ilesanmi OJ, Gedil M, Job AO, Olaniyan AB. Assessment  
736 of genetic diversity among low-nitrogen-tolerant early generation maize inbred lines  
737 using SNP markers. *South African J Plant Soil.* 2019; 36(3):181–8.  
738 doi:10.1080/02571862.2018.1537010.
- 739 69. Singh N, Agarwal N, Yadav HK. Genome-wide SNP-based diversity analysis and  
740 association mapping in linseed (*Linum usitatissimum* L.). *Euphytica.* 2019;  
741 215(8):139.
- 742 70. Razak SA, Azman NHEN, Kamaruzaman R, Saidon SA, Yusof MFM, Ismail SN, et  
743 al. Genetic diversity of released malaysian rice varieties based on single nucleotide  
744 polymorphism markers. *Czech J Genet Plant Breed.* 2020; 56: 62–70.  
745 doi:10.17221/58/2019-CJGPB.
- 746 71. Coates BS, Sumerford D V, Miller NJ, Kim KS, Sappington TW, Siegfried BD, et al.  
747 Comparative performance of single nucleotide polymorphism and microsatellite  
748 markers for population genetic analysis. *J Hered.* 2009; 100(5): 556–64.

- 749 72. Diers BW, Osborn TC. Genetic diversity of oilseed *Brassica napus* germ plasm based  
750 on restriction fragment length polymorphisms. *Theor Appl Genet.* 1994; 88: 662–668.  
751 doi:10.1007/BF01253968.
- 752 73. Hasan M, Seyis F, Badani AG, Pons-Kühnemann J, Friedt W, Lühs W, et al. Analysis  
753 of genetic diversity in the *Brassica napus* L. gene pool using SSR markers. *Genet*  
754 *Resour Crop Evol.* 2006; 53: 793–802. doi:10.1007/s10722-004-5541-2.
- 755 74. Gazave E, Tassone EE, Ilut DC, Wingerson M, Datema E, Witsenboer HMA, et al.  
756 Population genomic analysis reveals differential evolutionary histories and patterns of  
757 diversity across subgenomes and subpopulations of *Brassica napus* L. *Front Plant Sci.*  
758 2016; 7:525. doi:10.3389/fpls.2016.00525.
- 759 75. Yuan M, Zhou Y, Liu D. Genetic diversity among populations and breeding lines from  
760 recurrent selection in *Brassica napus* as revealed by RAPD markers. *Plant Breed.*  
761 2004; 123: 9-12. doi:10.1046/j.0179-9541.2003.00903.x.
- 762 76. Li L, Chokchai W, Huang X, Huang T, Huang T, Li Q, et al. Comparison of AFLP  
763 and SSR for Genetic Diversity Analysis of *Brassica napus* Hybrids. *J Agric Sci.* 2011;  
764 3: 101-110. doi:10.5539/jas.v3n3p101.
- 765 77. Gyawali S, Hegedus DD, Parkin IAP, Poon J, Higgins E, Horner K, et al. Genetic  
766 diversity and population structure in a world collection of *Brassica napus* accessions  
767 with emphasis on South Korea, Japan, and Pakistan. *Crop Sci.* 2013; 53, 1537-1545.  
768 doi:10.2135/cropsci2012.10.0614.
- 769 78. Morinaga T. Preliminary Note on Interspecific Hybridization in *Brassica*. *Proc Imp*  
770 *Acad.* 1929; 4: 620–622. doi:10.2183/pjab1912.4.620.

- 771 79. Cheung F, Trick M, Drou N, Lim YP, Park JY, Kwon SJ, et al. Comparative analysis  
772 between homoeologous genome segments of *Brassica napus* and its progenitor species  
773 reveals extensive sequence-level divergence. *Plant Cell*. 2009; 21: 1912–1928.  
774 doi:10.1105/tpc.108.060376.
- 775 80. Gómez-Campo C, Prakash S. 2 Origin and domestication. *Dev Plant Genet Breed*.  
776 1999; 4: 33–58. doi:10.1016/S0168-7972(99)80003-6.
- 777 81. Xiao Y, Chen L, Zou J, Tian E, Xia W, Meng J. Development of a population for  
778 substantial new type *Brassica napus* diversified at both A/C genomes. *Theor Appl*  
779 *Genet*. 2010; 121(6): 1141–50.
- 780 82. Monfared MA, Samsampour D, Sharifi-Sirchi GR, Sadeghi F. Assessment of genetic  
781 diversity in *Salvadora persica* L. based on inter simple sequence repeat (ISSR) genetic  
782 marker. *J Genet Eng Biotechnol*. 2018; 16(2):661–7.
- 783 83. Tajima F. Statistical method for testing the neutral mutation hypothesis by DNA  
784 polymorphism. *Genetics*. 1989; 123(3):585–95.
- 785 84. Suzuki Y. Statistical methods for detecting natural selection from genomic data. *Genes*  
786 *and Genetic Systems*. 2010; 85: 359-376. doi:10.1266/ggs.85.359.
- 787 85. Torati LS, Taggart JB, Varela ES, Araripe J, Wehner S, Migaud H. Genetic diversity  
788 and structure in *Arapaima gigas* populations from Amazon and Araguaia-Tocantins  
789 river basins. *BMC Genet*. 2019; 20(1):13. doi:10.1186/s12863-018-0711-y.
- 790 86. Wright S. The interpretation of population structure by F-statistics with special regard  
791 to systems of mating. *Evolution (N Y)*. 1965; 19(3):395–420.
- 792 87. Xiao Y, Cai D, Yang W, Ye W, Younas M, Wu J, et al. Genetic structure and linkage  
793 disequilibrium pattern of a rapeseed (*Brassica napus* L.) association mapping panel

- 794 revealed by microsatellites. *Theor Appl Genet.* 2012; 125, 437-447.  
795 doi:10.1007/s00122-012-1843-5.
- 796 88. Liu S, Fan C, Li J, Cai G, Yang Q, Wu J, et al. A genome-wide association study  
797 reveals novel elite allelic variations in seed oil content of *Brassica napus*. *Theor Appl*  
798 *Genet.* 2016; 129: 1203–1215. doi:10.1007/s00122-016-2697-z.
- 799 89. Chen R, Hara T, Ohsawa R, Yoshioka Y. Analysis of genetic diversity of rapeseed  
800 genetic resources in Japan and core collection construction. *Breed Sci.* 2017; 67: 239-  
801 247. doi:10.1270/jsbbs.16192.
- 802 90. Qian W, Sass O, Meng J, Li M, Frauen M, Jung C. Heterotic patterns in rapeseed  
803 (*Brassica napus* L.): I. Crosses between spring and Chinese semi-winter lines. *Theor*  
804 *Appl Genet.* 2007; 115(1):27–34.
- 805 91. Bus A, Körber N, Snowdon RJ, Stich B. Patterns of molecular variation in a species-  
806 wide germplasm set of *Brassica napus*. *Theor Appl Genet.* 2011; 123: 1413–1423.  
807 doi:10.1007/s00122-011-1676-7.
- 808 92. Flad DWF. Use of Rutabaga (*Brassica napus* var. *napobrassica*) for the Improvement  
809 of Canadian Spring Canola (*Brassica napus*). [Master's thesis]. [Alberta (CA)]:  
810 University of Alberta. 2016; doi: 10.7939/R3319S744.
- 811 93. Shiranifar B, Hobson N, Kebede B, Yang RC, Rahman H. Potential of rutabaga  
812 (*Brassica napus* var. *napobrassica*) gene pool for use in the breeding of *B. napus*  
813 canola. *Crop Sci.* 2020; 60: 157-171. doi:10.1002/csc2.20074.
- 814 94. Cruz VM V., Luhman R, Marek LF, Rife CL, Shoemaker RC, Brummer EC, et al.  
815 Characterization of flowering time and SSR marker analysis of spring and winter type

- 816 Brassica napus L. germplasm. Euphytica. 2007; 153: 43-57. doi:10.1007/s10681-006-  
817 9233-1.
- 818 95. Malmberg MM, Shi F, Spangenberg GC, Daetwyler HD, Cogan NOI. Diversity and  
819 genome analysis of australian and global oilseed *Brassica napus* L. Germplasm using  
820 transcriptomics and whole genome re-sequencing. Front Plant Sci. 2018; 9:508.  
821 doi:10.3389/fpls.2018.00508.
- 822 96. Jakobsson M, Edge MD, Rosenberg NA. The relationship between FST and the  
823 frequency of the most frequent allele. Genetics. 2013; 193: 515-528.  
824 doi:10.1534/genetics.112.144758.
- 825 97. Bernardo R, Romero-Severson J, Ziegler J, Hauser J, Joe L, Hookstra G, et al. Parental  
826 contribution and coefficient of coancestry among maize inbreds: pedigree, RFLP, and  
827 SSR data. Theor Appl Genet. 2000; 100(3-4): 552-6.
- 828 98. Goode EL. Linkage Disequilibrium. In: Schwab M, editor. Encyclopedia of Cancer  
829 [Internet]. Berlin, Heidelberg: Springer Berlin Heidelberg; 2011. p. 2043-8. Available  
830 from: [https://doi.org/10.1007/978-3-642-16483-5\\_3368](https://doi.org/10.1007/978-3-642-16483-5_3368)
- 831 99. Guryev V, Smits BMG, Van De Belt J, Verheul M, Hubner N, Cuppen E. Haplotype  
832 block structure is conserved across mammals. PLoS Genet. 2006; 2: e121.  
833 doi:10.1371/journal.pgen.0020121.
- 834 100. Reich DE, Cargili M, Boik S, Ireland J, Sabeti PC, Richter DJ, et al. Linkage  
835 disequilibrium in the human genome. Nature. 2001; 411: 199-204.  
836 doi:10.1038/35075590.

- 837 101. Kim S, Plagnol V, Hu TT, Toomajian C, Clark RM, Ossowski S, et al. Recombination  
838 and linkage disequilibrium in *Arabidopsis thaliana*. *Nat Genet.* 2007; 39: 1151–1155.  
839 doi:10.1038/ng2115.
- 840 102. Sachs MM. Cereal germplasm resources. *Plant Physiology.* 2009; 149: 148–151.  
841 doi:10.1104/pp.108.129205.
- 842 103. Brachi B, Morris GP, Borevitz JO. Genome-wide association studies in plants: The  
843 missing heritability is in the field. *Genome Biology.* 2011; 12: 232. doi:10.1186/gb-  
844 2011-12-10-232.
- 845 104. Jia G, Huang X, Zhi H, Zhao Y, Zhao Q, Li W, et al. A haplotype map of genomic  
846 variations and genome-wide association studies of agronomic traits in foxtail millet  
847 (*Setaria italica*). *Nat Genet.* 2013; 45: 957–961. doi:10.1038/ng.2673.
- 848 105. Rakow G, Woods DL. Outcrossing in rape and mustard under saskatchewan prairie  
849 conditions. *Can J Plant Sci.* 1987; 67: 147–151. doi:10.4141/cjps87-017.
- 850 106. Becker HC, Damgaard C, Karlsson B. Environmental variation for outcrossing rate in  
851 rapeseed (*Brassica napus*). *Theor Appl Genet.* 1992; 84: 303-306.  
852 doi:10.1007/BF00229487.
- 853 107. Cuthbert JL, McVetty PBE. Plot-to-plot, row-to-row and plant-to-plant outcrossing  
854 studies in oilseed rape. *Can J Plant Sci.* 2001; 81: 657–664. doi:10.4141/P01-070.
- 855 108. Wu Z, Wang B, Chen X, Wu J, King GJ, Xiao Y, et al. Evaluation of linkage  
856 disequilibrium pattern and association study on seed oil content in *Brassica napus*  
857 using ddRAD sequencing. *PLoS One.* 2016; 11: e0146383.  
858 doi:10.1371/journal.pone.0146383.



- 859 109. Zhou Q, Zhou C, Zheng W, Mason AS, Fan S, Wu C, et al. Genome-wide SNP  
860 markers based on SLAF-seq uncover breeding traces in rapeseed (*Brassica napus* L.).  
861 Front Plant Sci. 2017; 8: 648. doi:10.3389/fpls.2017.00648.
- 862 110. Gao H, Ye S, Wu J, Wang L, Wang R, Lei W, et al. Genome-wide association analysis  
863 of aluminum tolerance related traits in rapeseed (*Brassica napus* L.) during  
864 germination. Genet Resour Crop Evol. 2020; doi:10.1007/s10722-020-00989-2.
- 865 111. Collins FS, Green ED, Guttmacher AE, Guyer MS. A vision for the future of  
866 genomics research. Nature. 2003; 422: 835-847. doi:10.1038/nature01626.

867

868

## 869 **Supporting information**

870 **S1 Table. List of the genotypes analyzed in this study.**

871 **S2 Table. Marker diversity parameters.**

872 **S3 Table. Subpopulation-wise marker diversity parameters.**

873 **S4 Table. (a) Percentage of variation explained by the first 3 axes, (b) Eigen values by axis**  
874 **and sample eigen vectors.**

875 **S5 Table. Kinship matrix.**

876

877 **S6 Table. Mean LD values according to distance.**

878 **S7 Table. Subpopulation-wise and chromosome-wise LD decay rate (Kb) within each**  
879 **subpopulation.**

880 **S8 Table. Subpopulation specific and common haplotype blocks.**

881 **S1 Fig. Histogram of IBS coefficients.**

882 **S2 Fig. Chromosome-wise LD decay rate (Kb) in A genome considering whole collection.**

883 **S3 Fig. Chromosome-wise LD decay rate (Kb) in C genome considering whole collection.**

884

885

# The number of SNPs within 1Mb window size

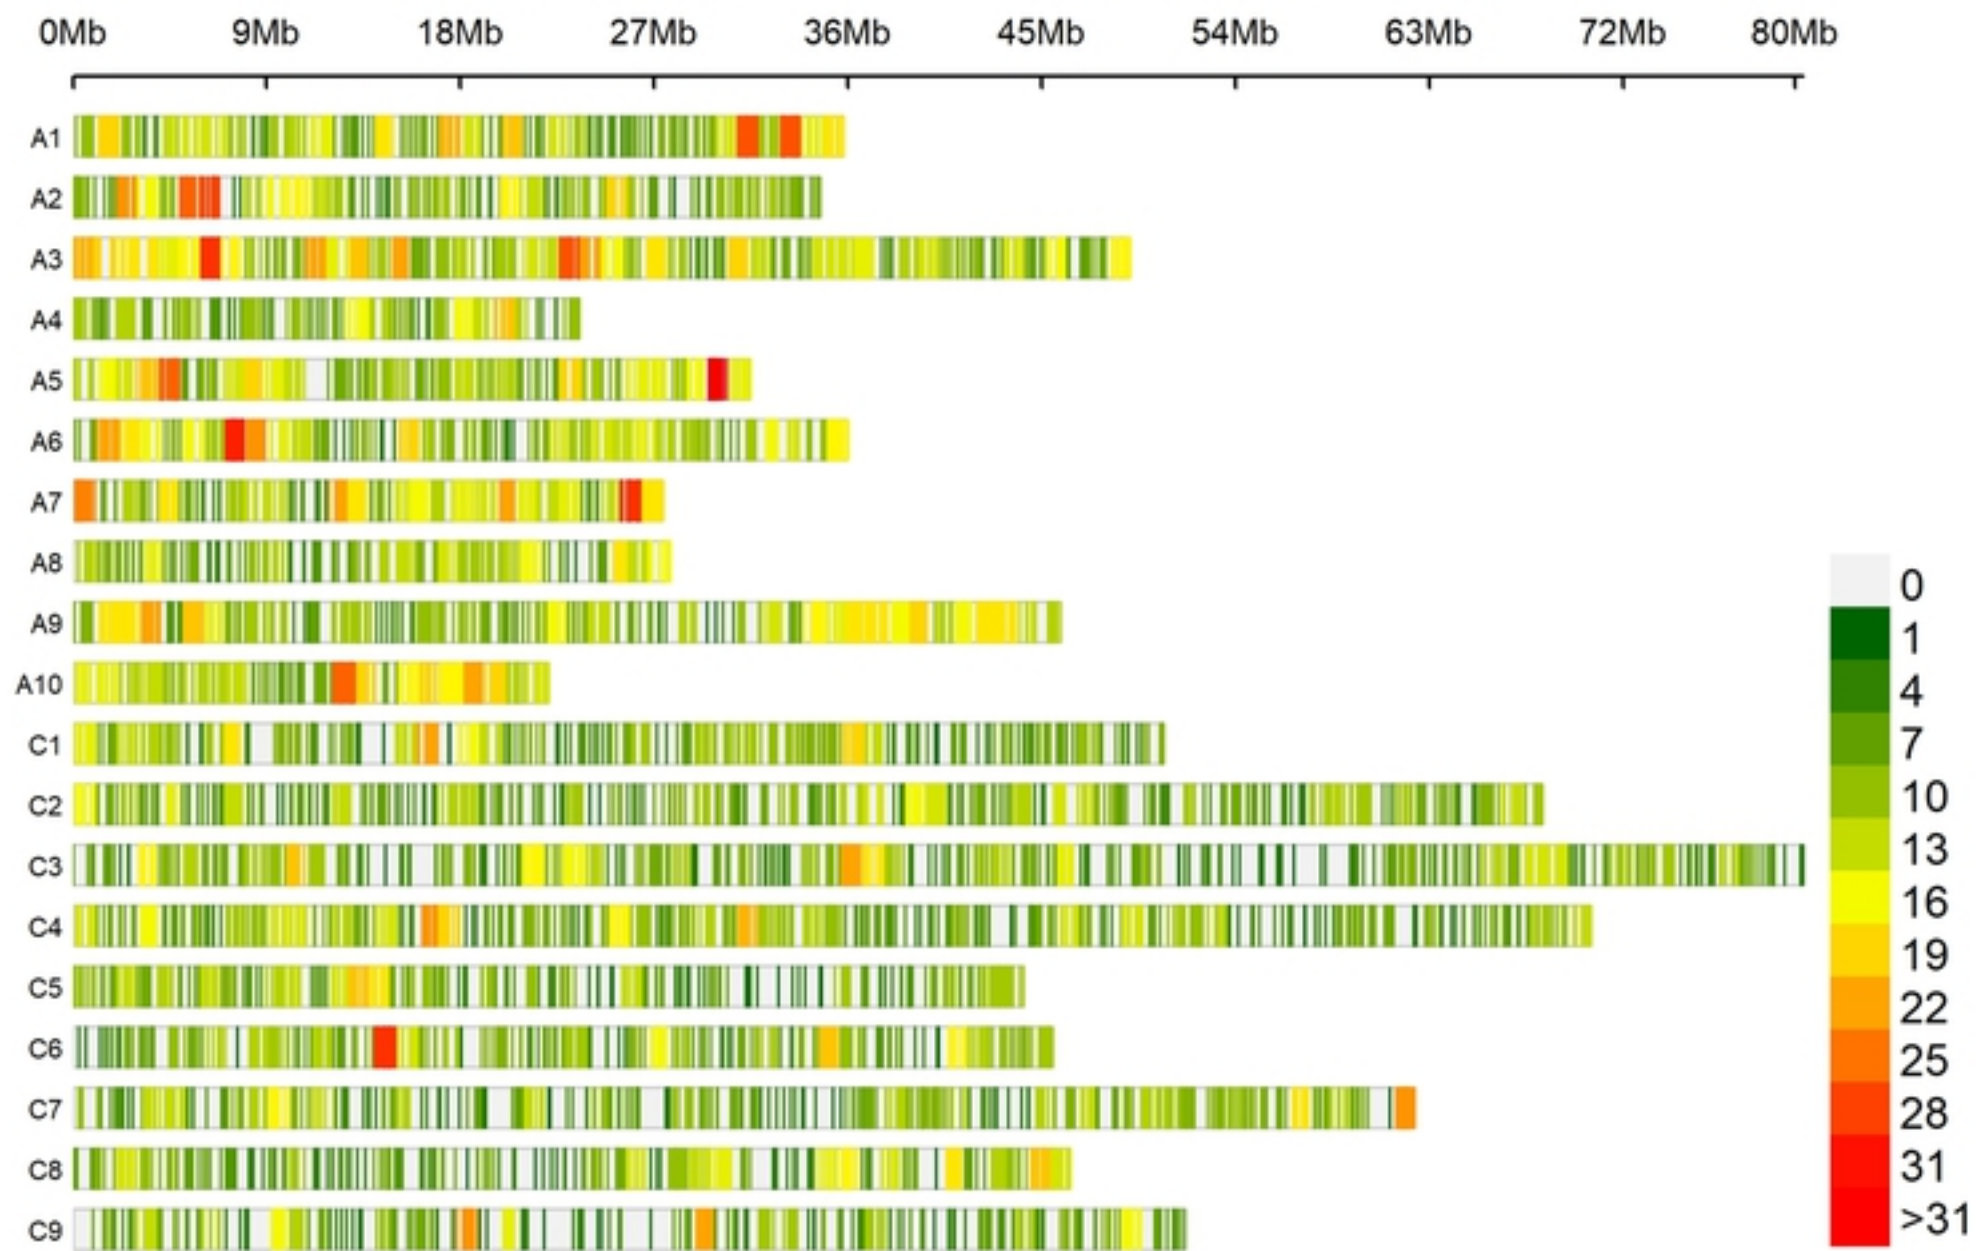

$$\text{DeltaK} = \text{mean}(|L''(K)|) / \text{sd}(L(K))$$

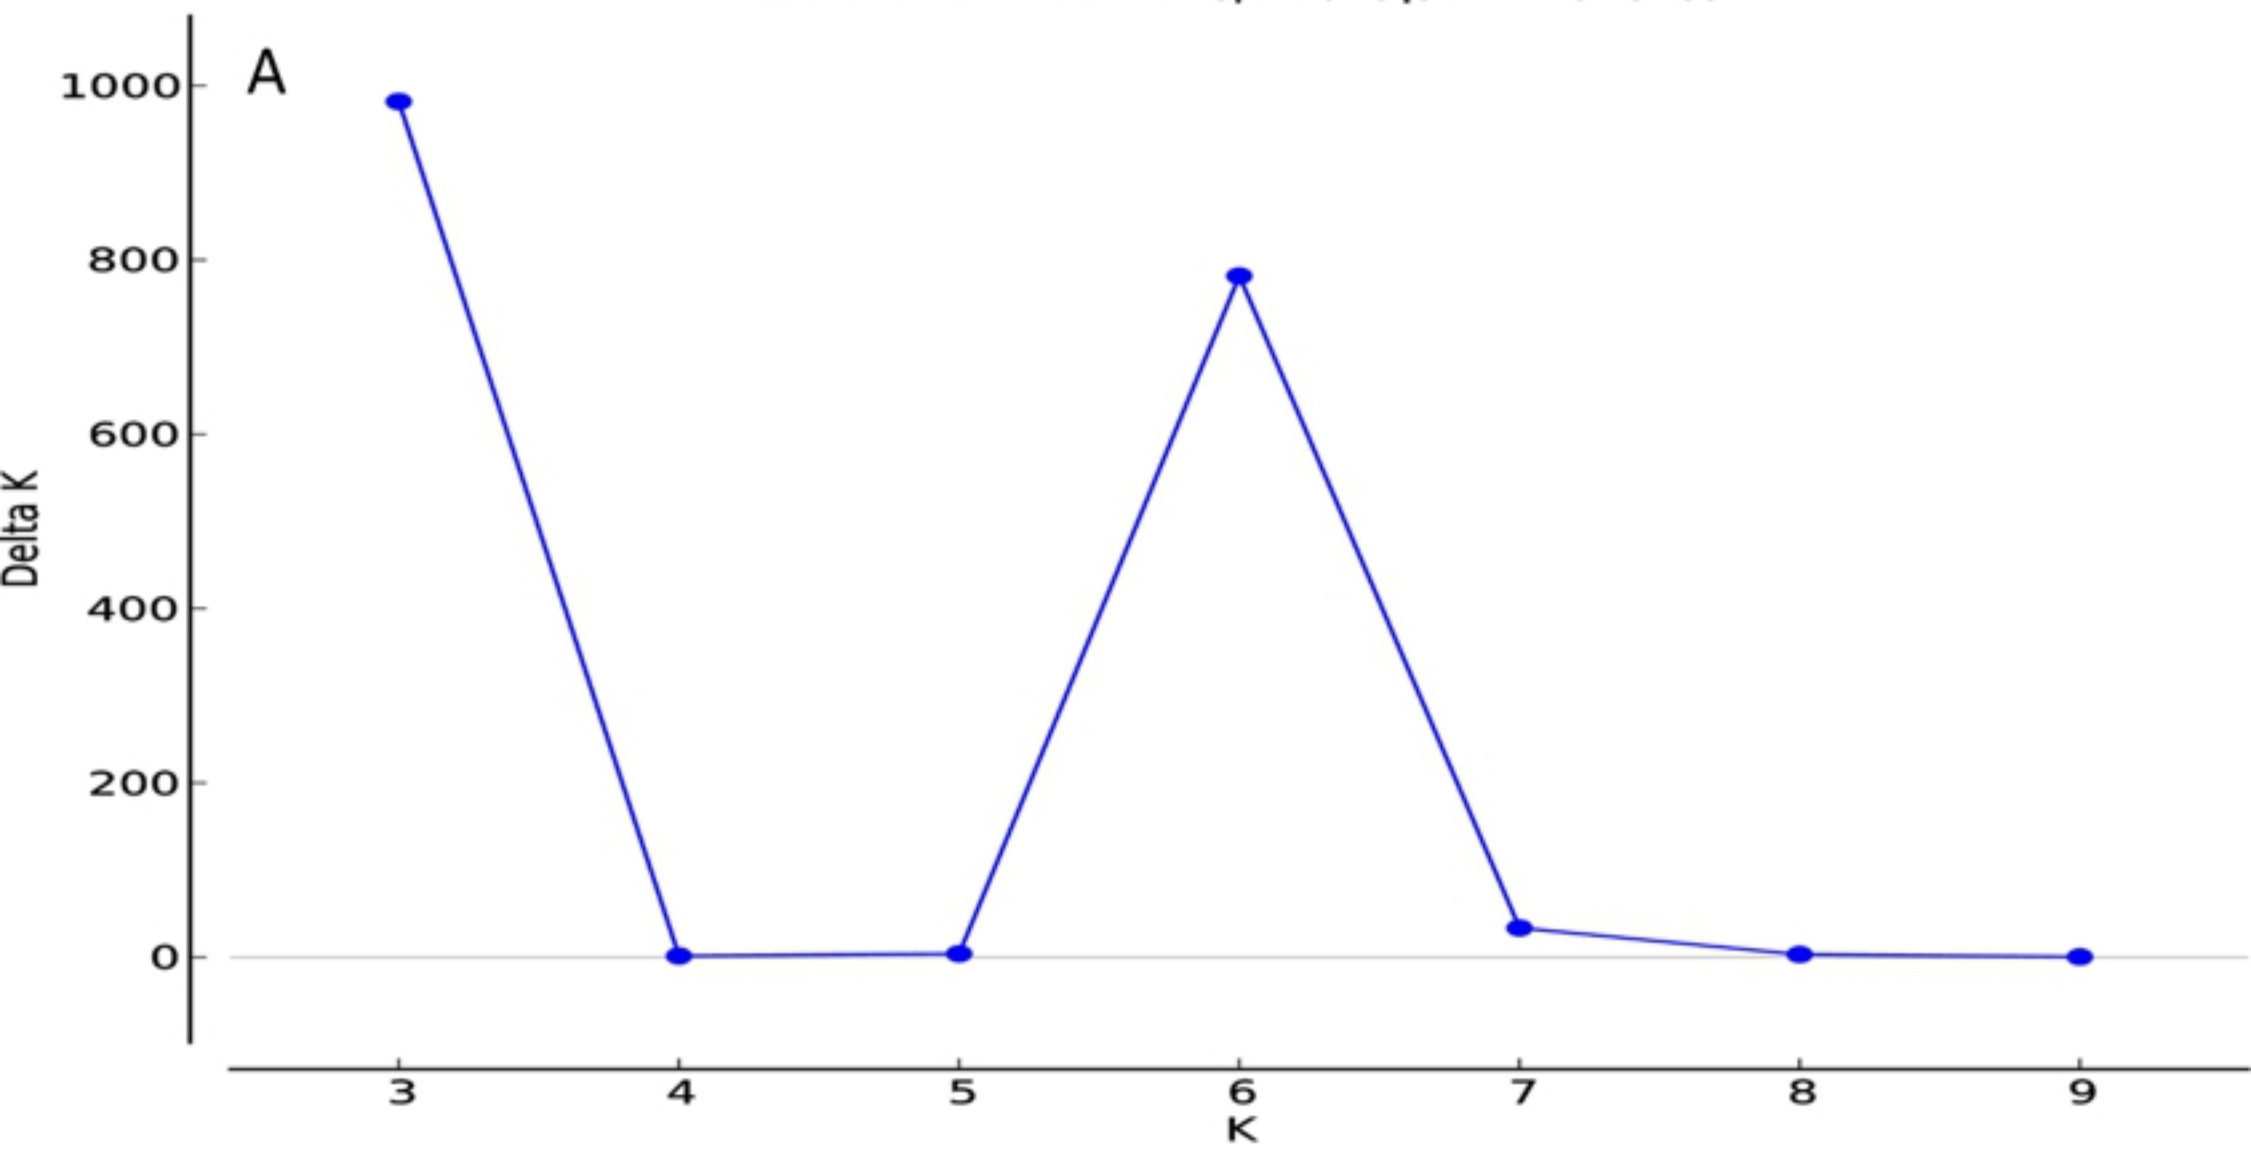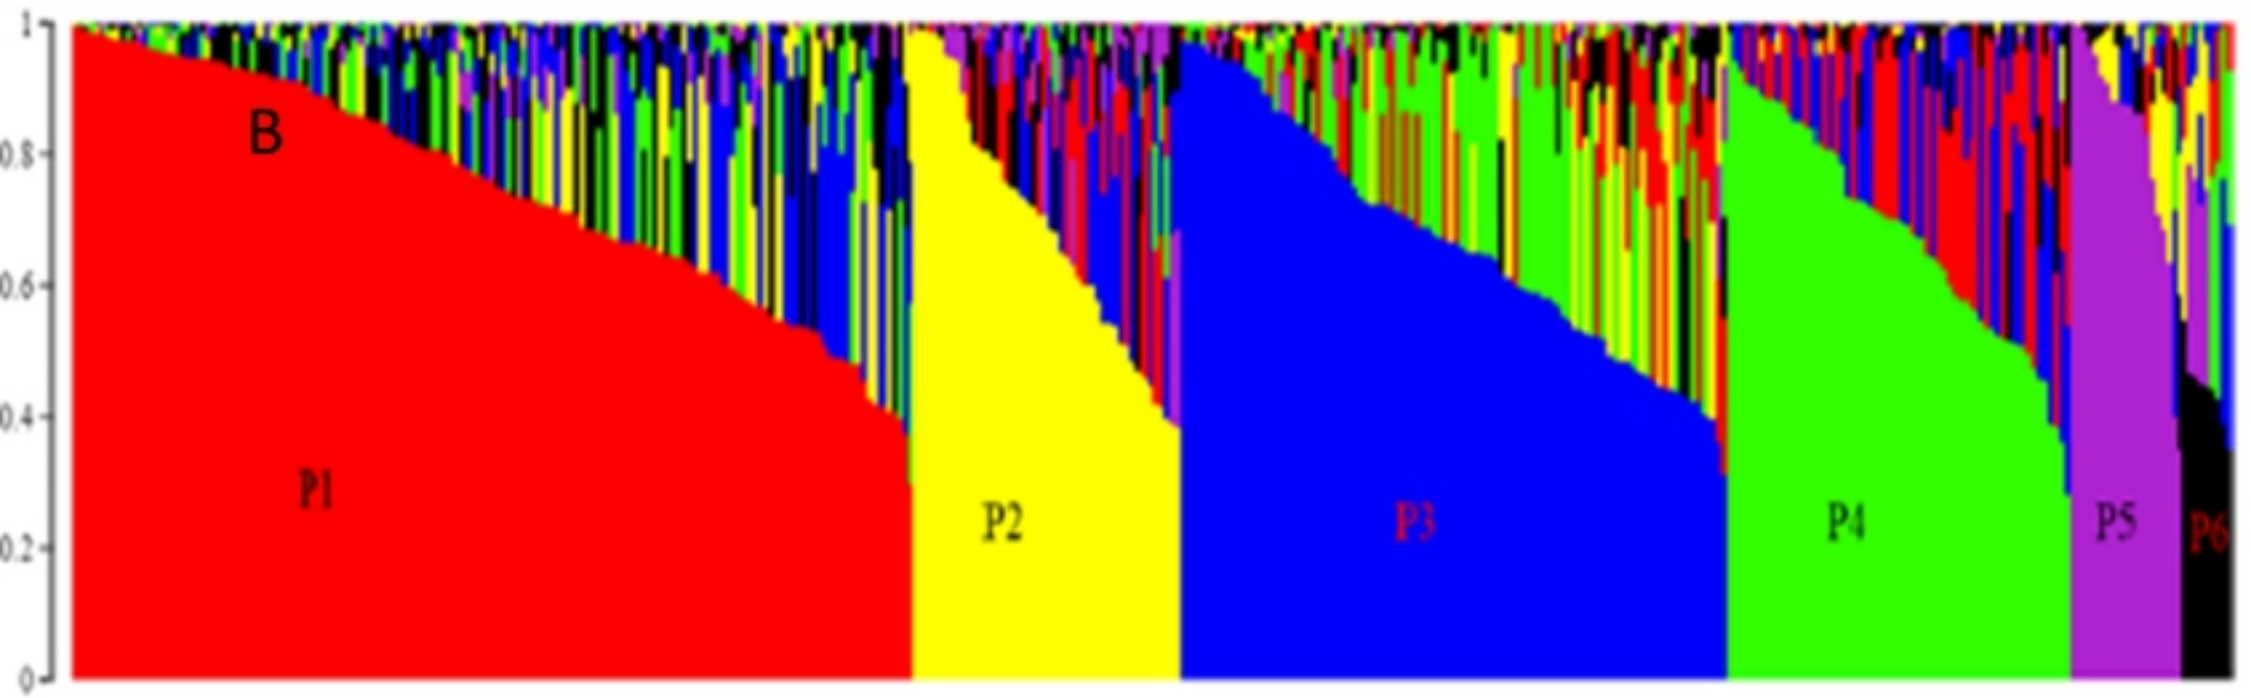

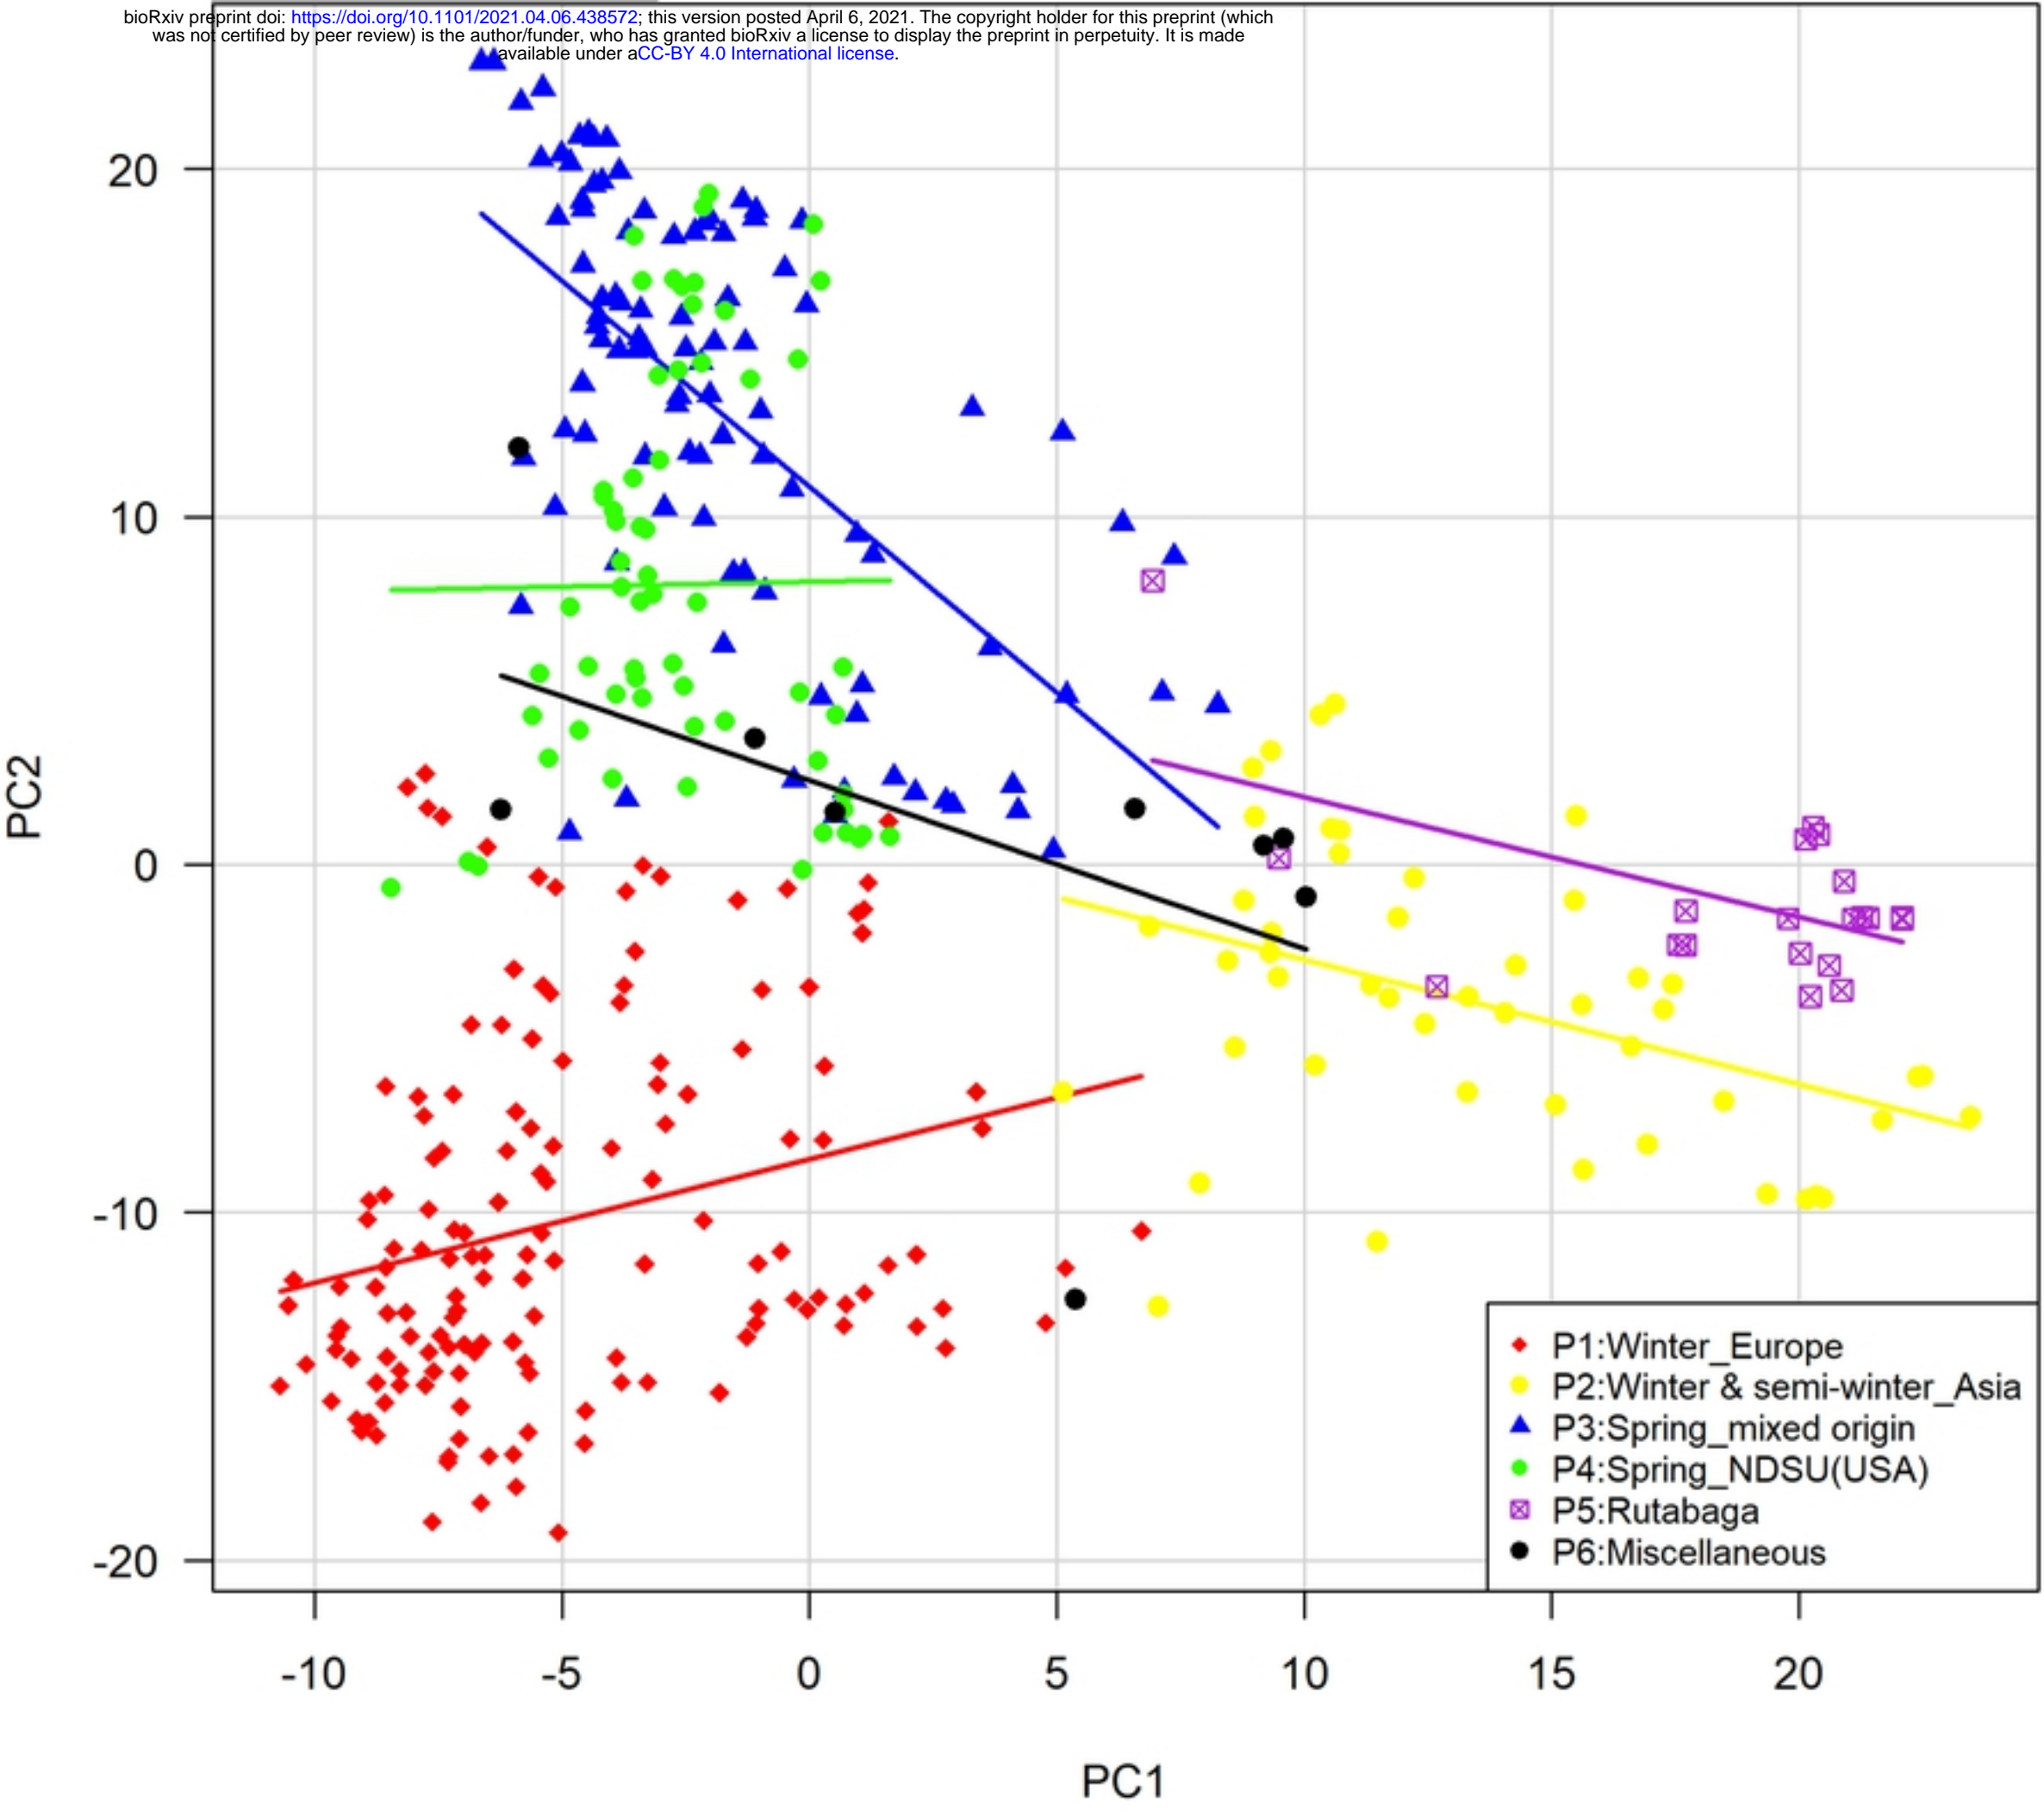

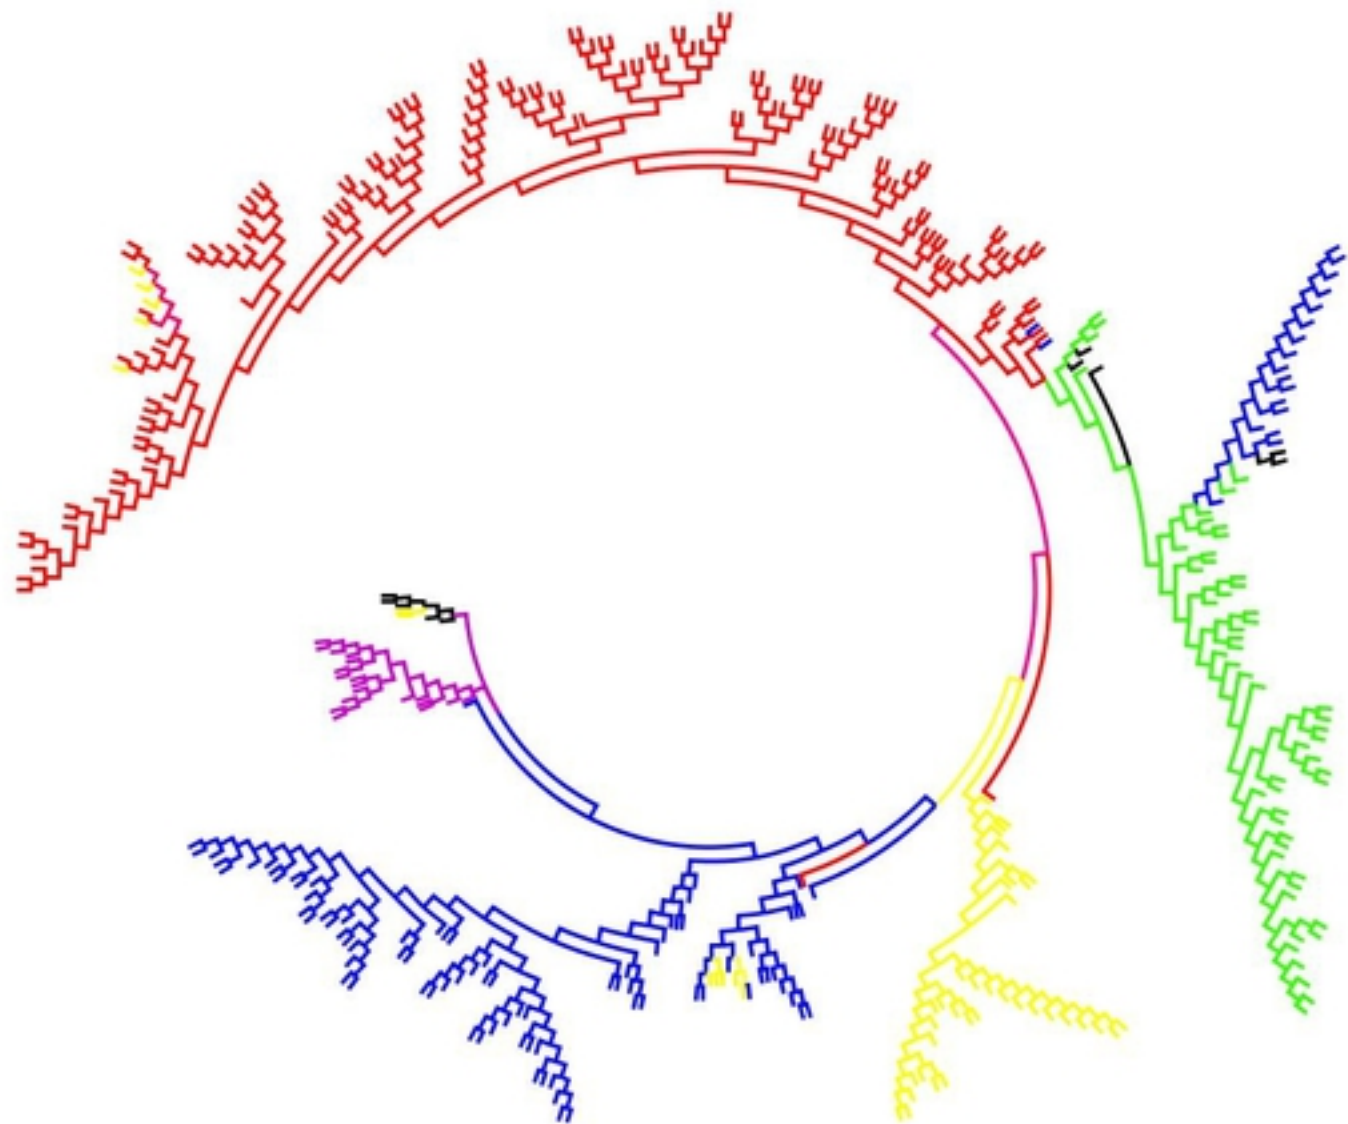

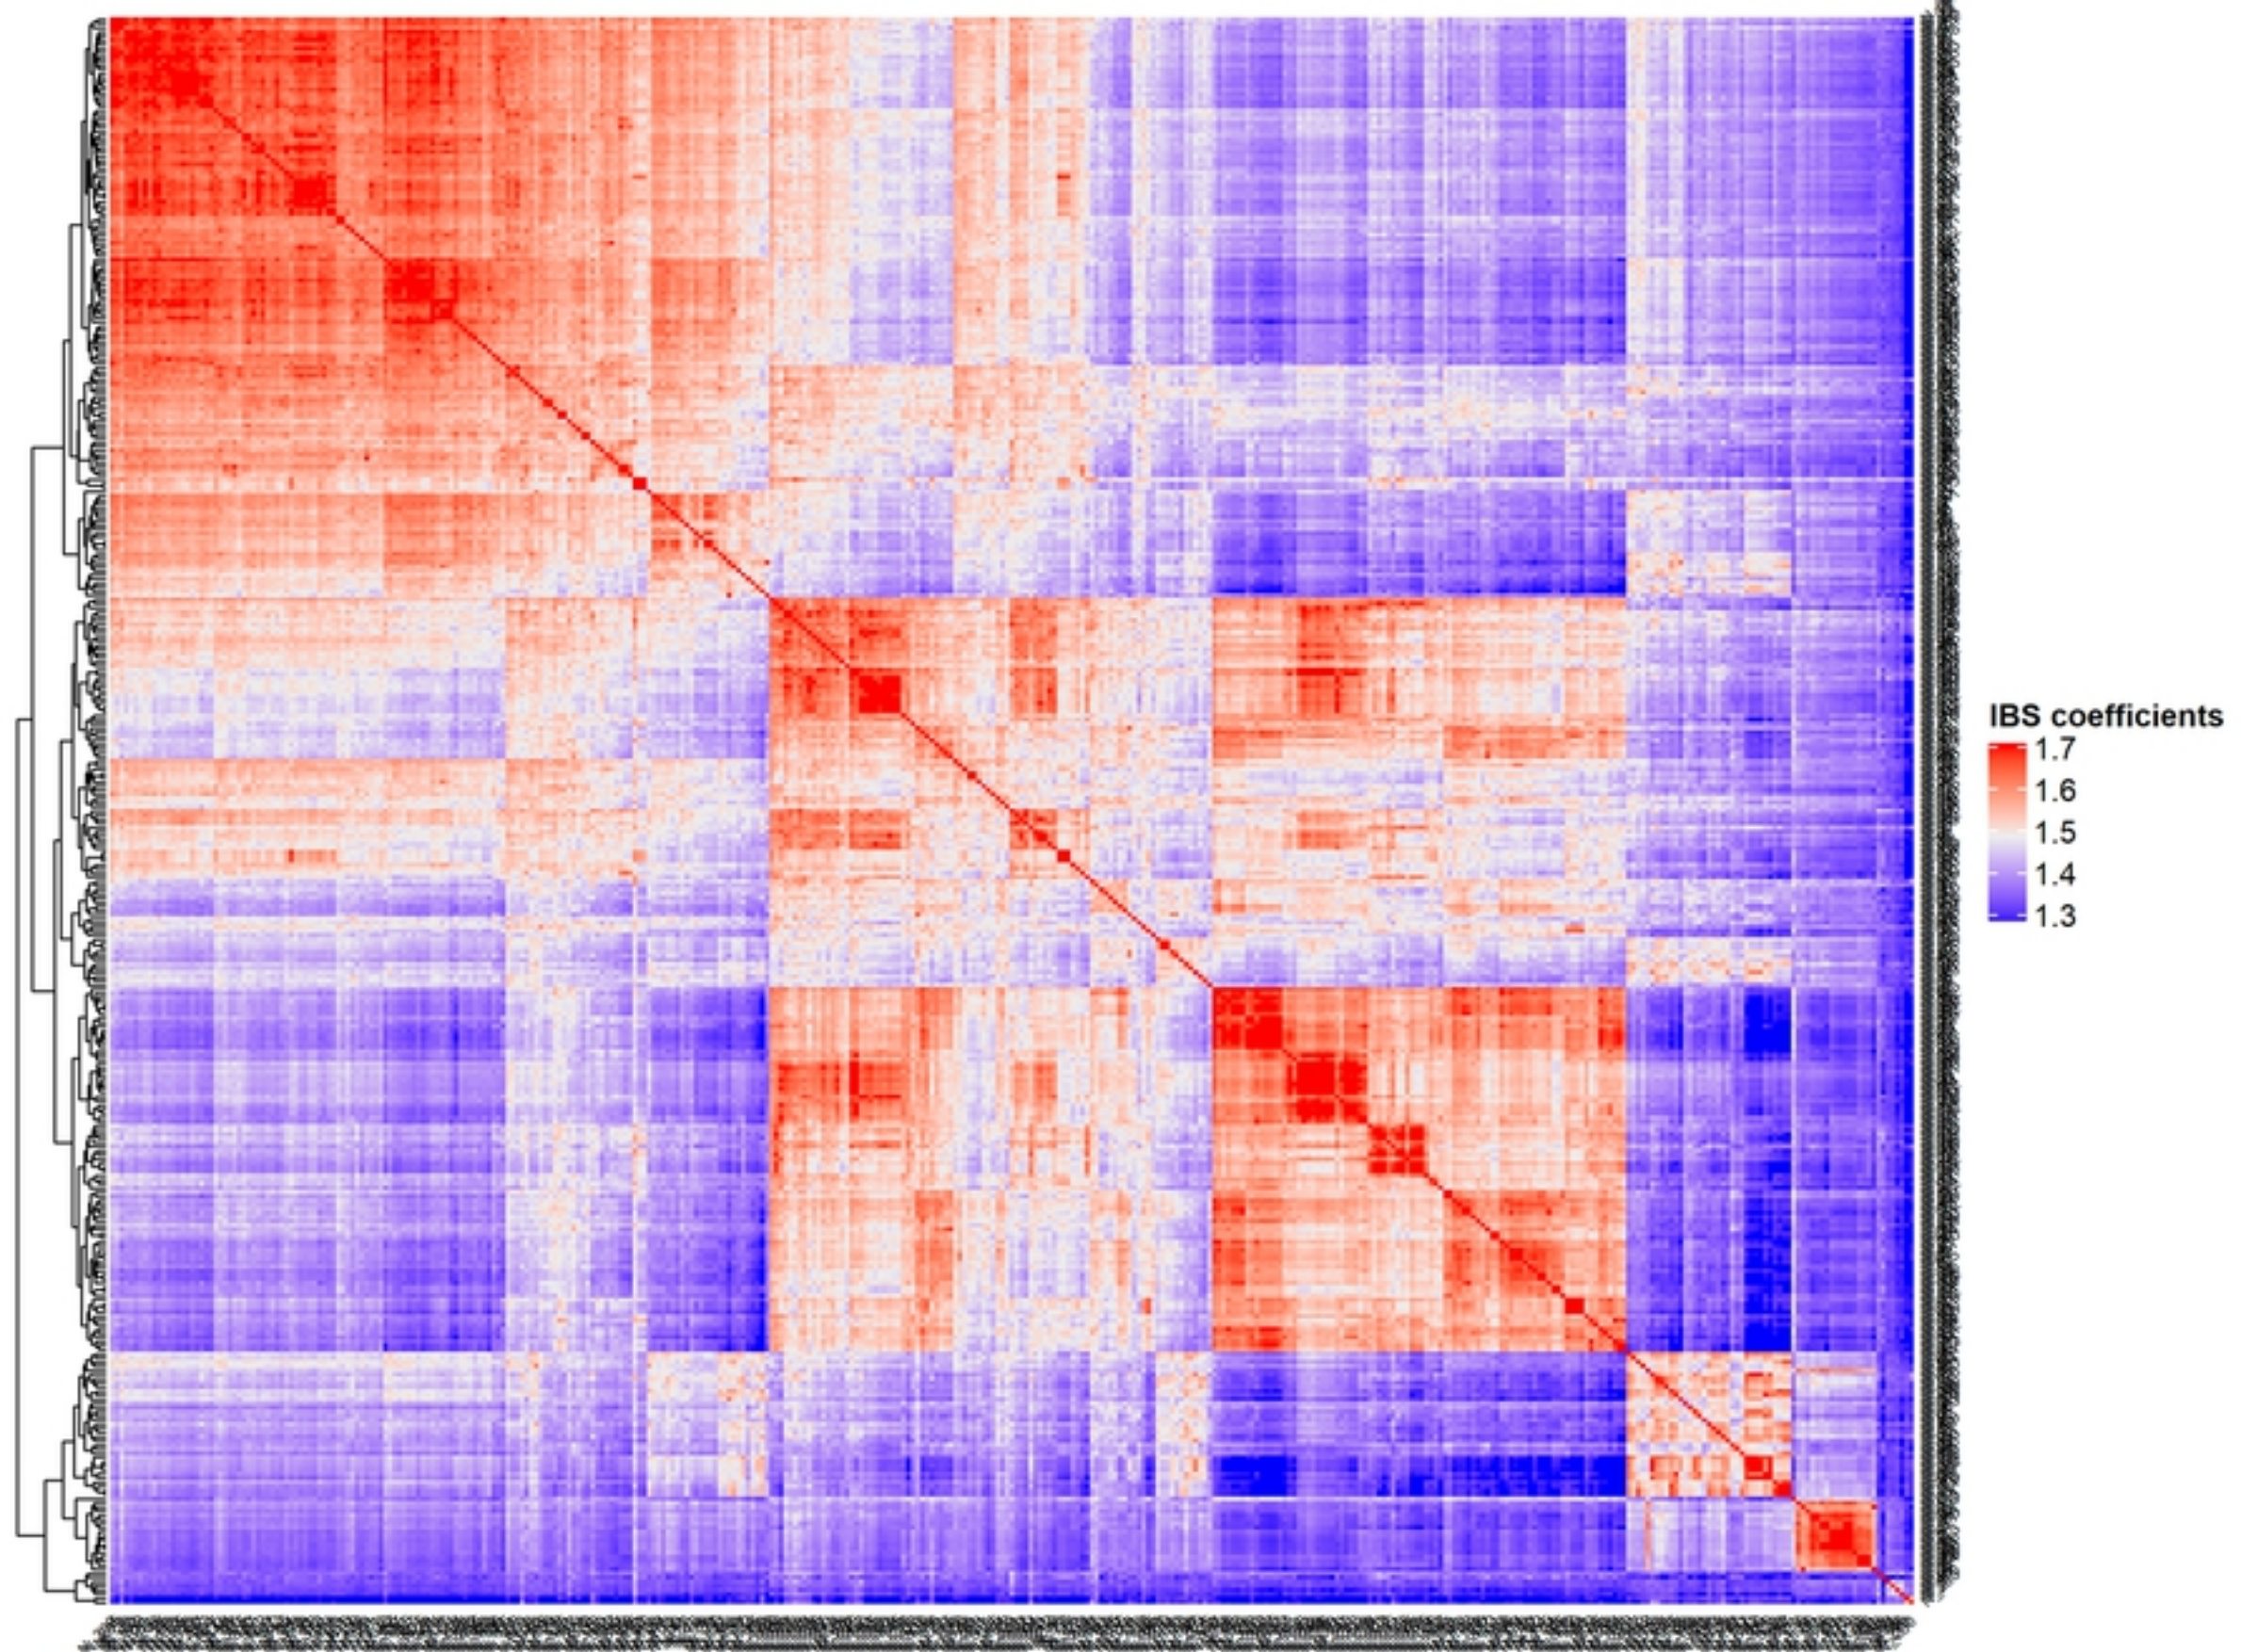

LD decay\_AC genome

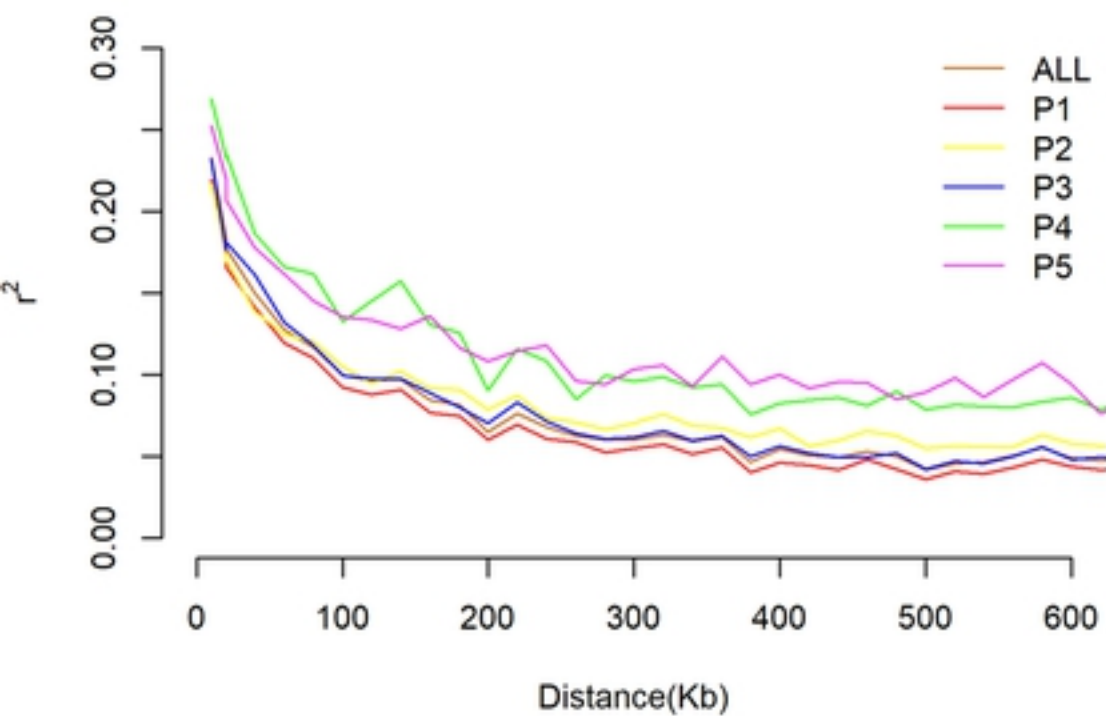

LD decay\_A genome

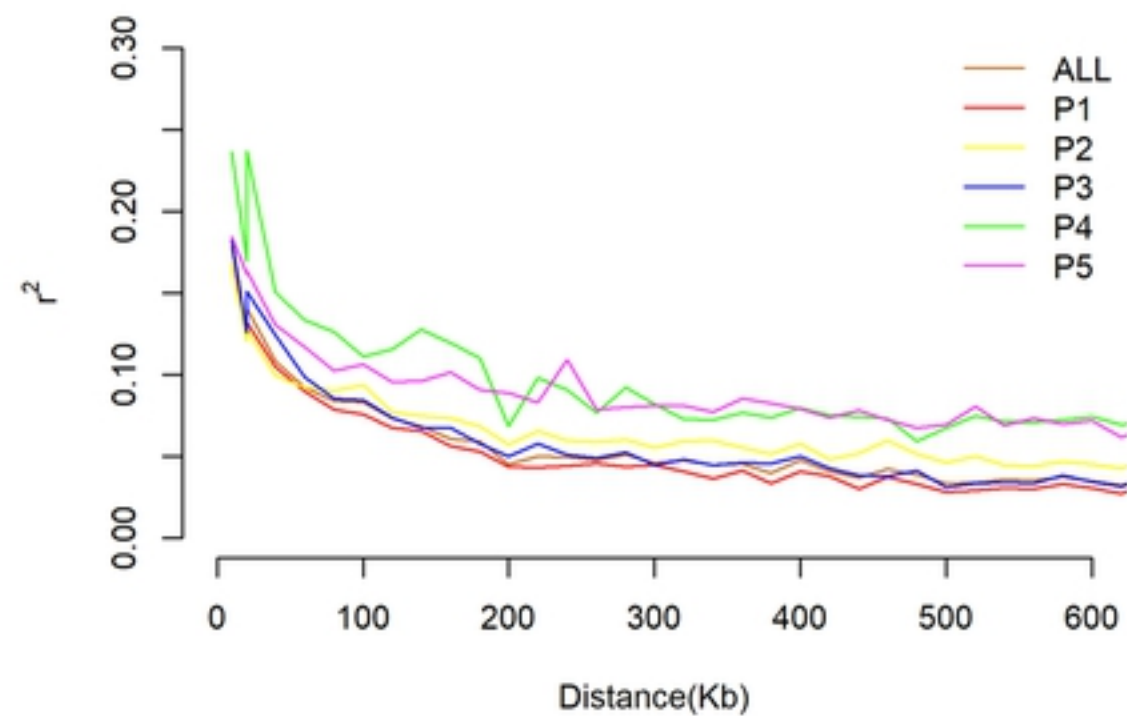

LD decay\_C genome

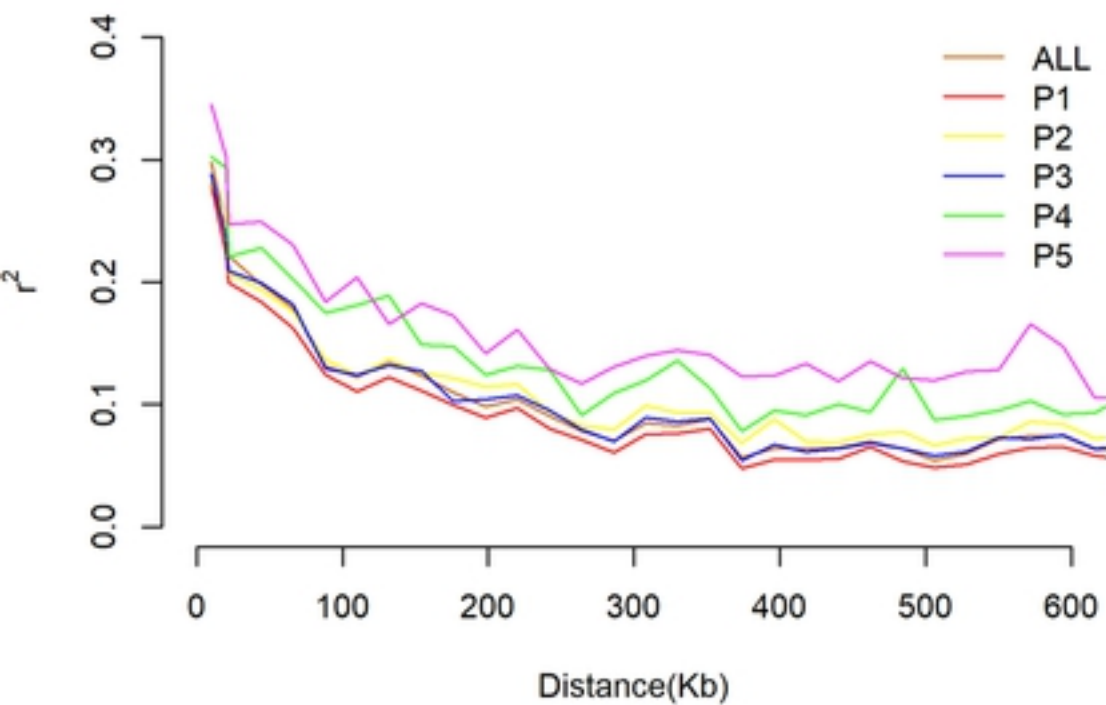

Source: https://www.biorxiv.org/content/10.1101/2021.04.06.438572v1.full.pdf
